# Supplementary material
Source: publisher site journal article supplement (https://www.dovepress.com/article/144418)
Supplement: Supplementary file 1 [file get_supplementary_file.php]

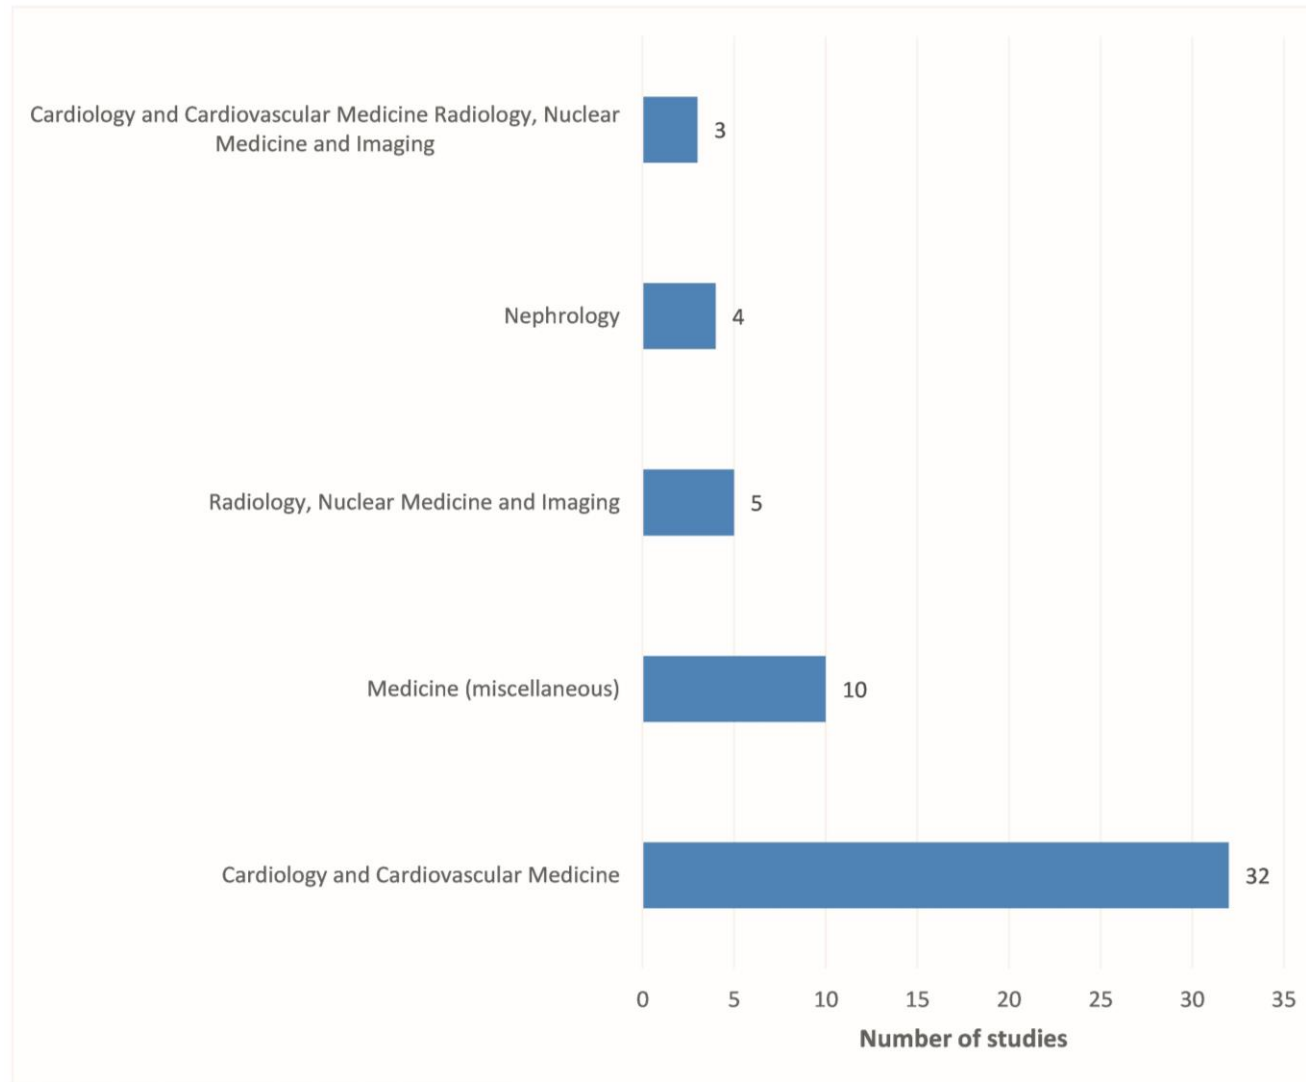

**S1 Figure. Top five subject areas of the journals of publication found among the studies included.**

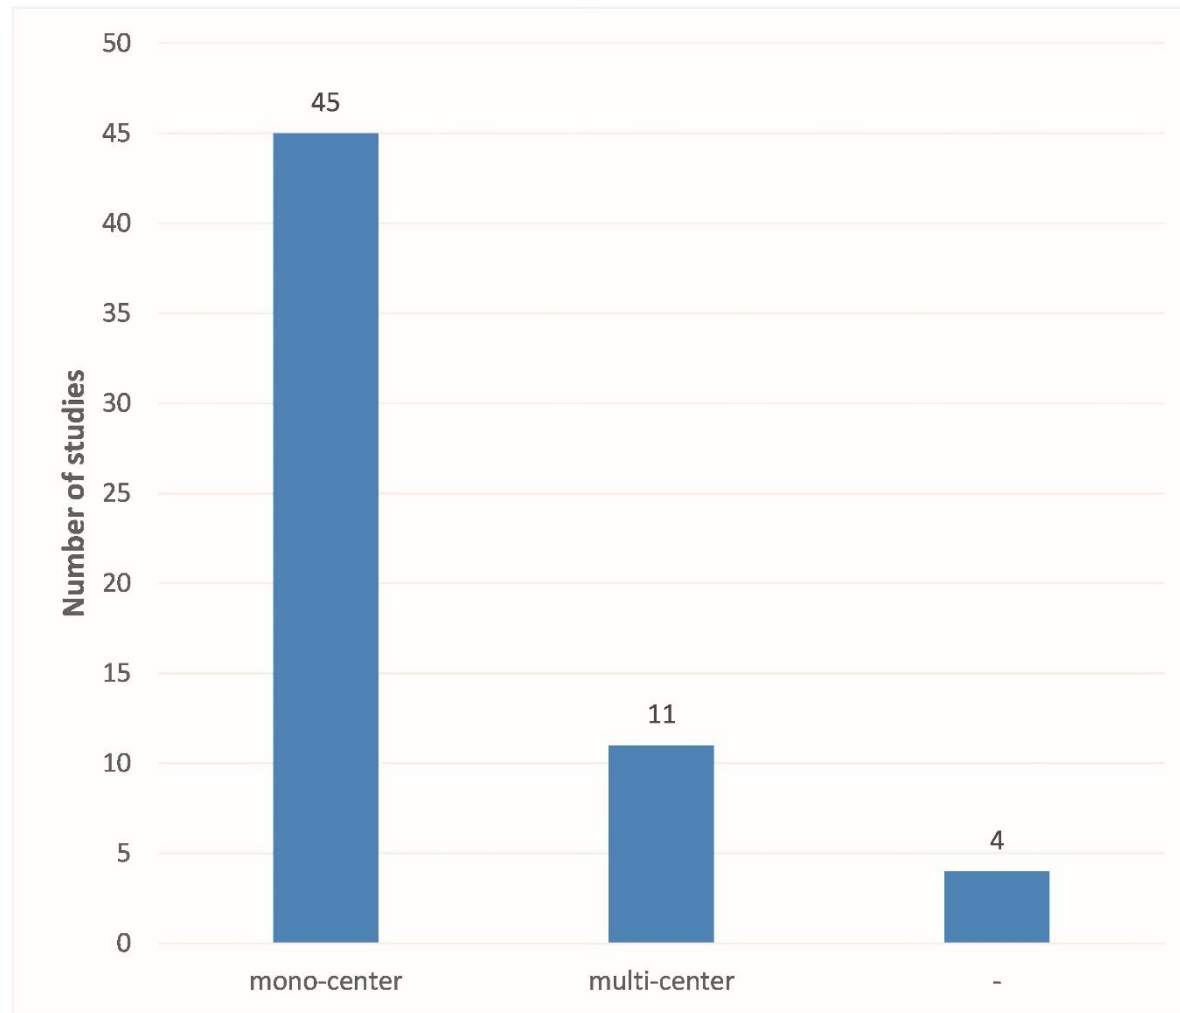

**S2 Figure. Distribution by mono-multicenter design of studies included. The symbol “-” was used to denote meta-analysis.**

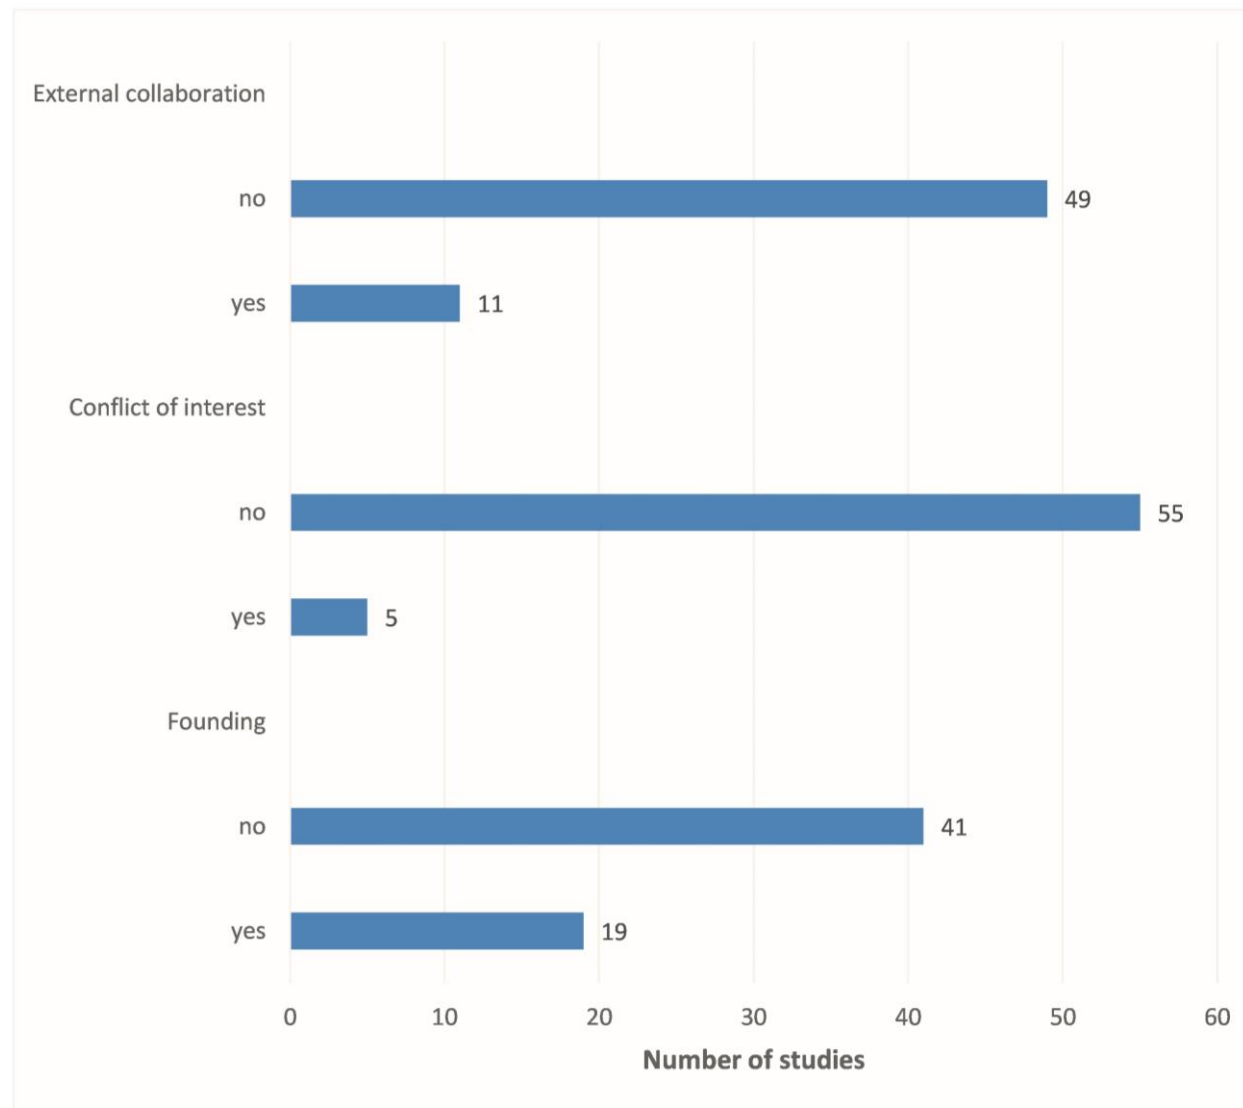

**S3 Figure. Distribution by the presence of external collaboration, conflict of interest and funding of studies included.**

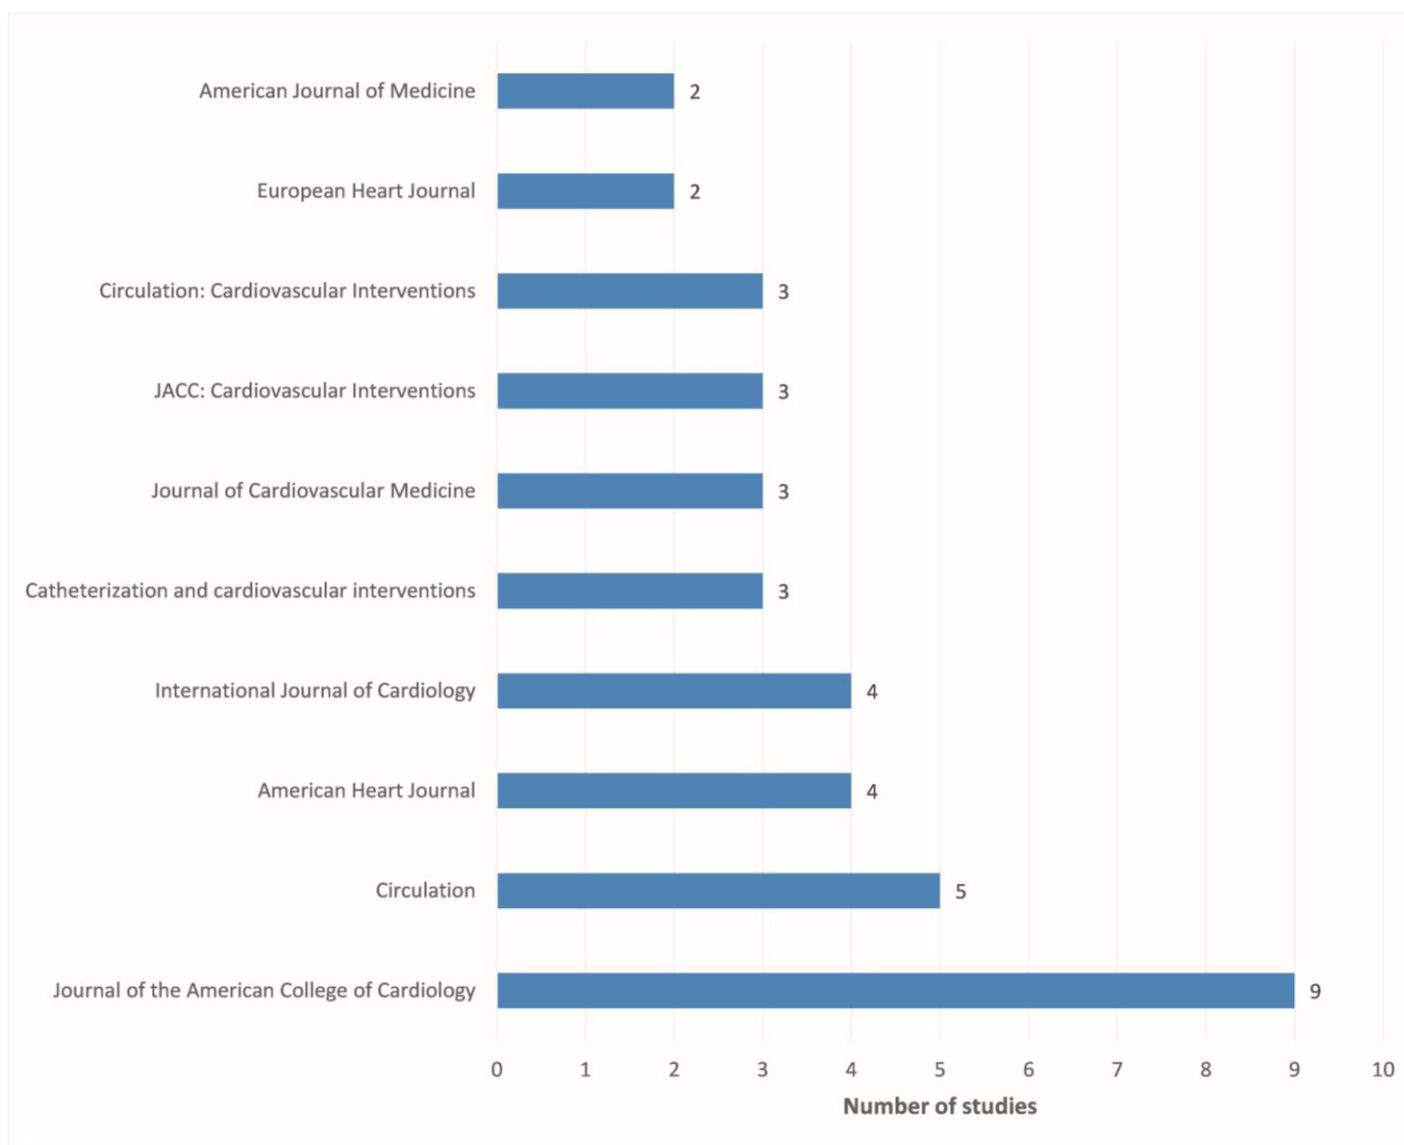

**S4 Figure. Top ten journals found among studies included.**

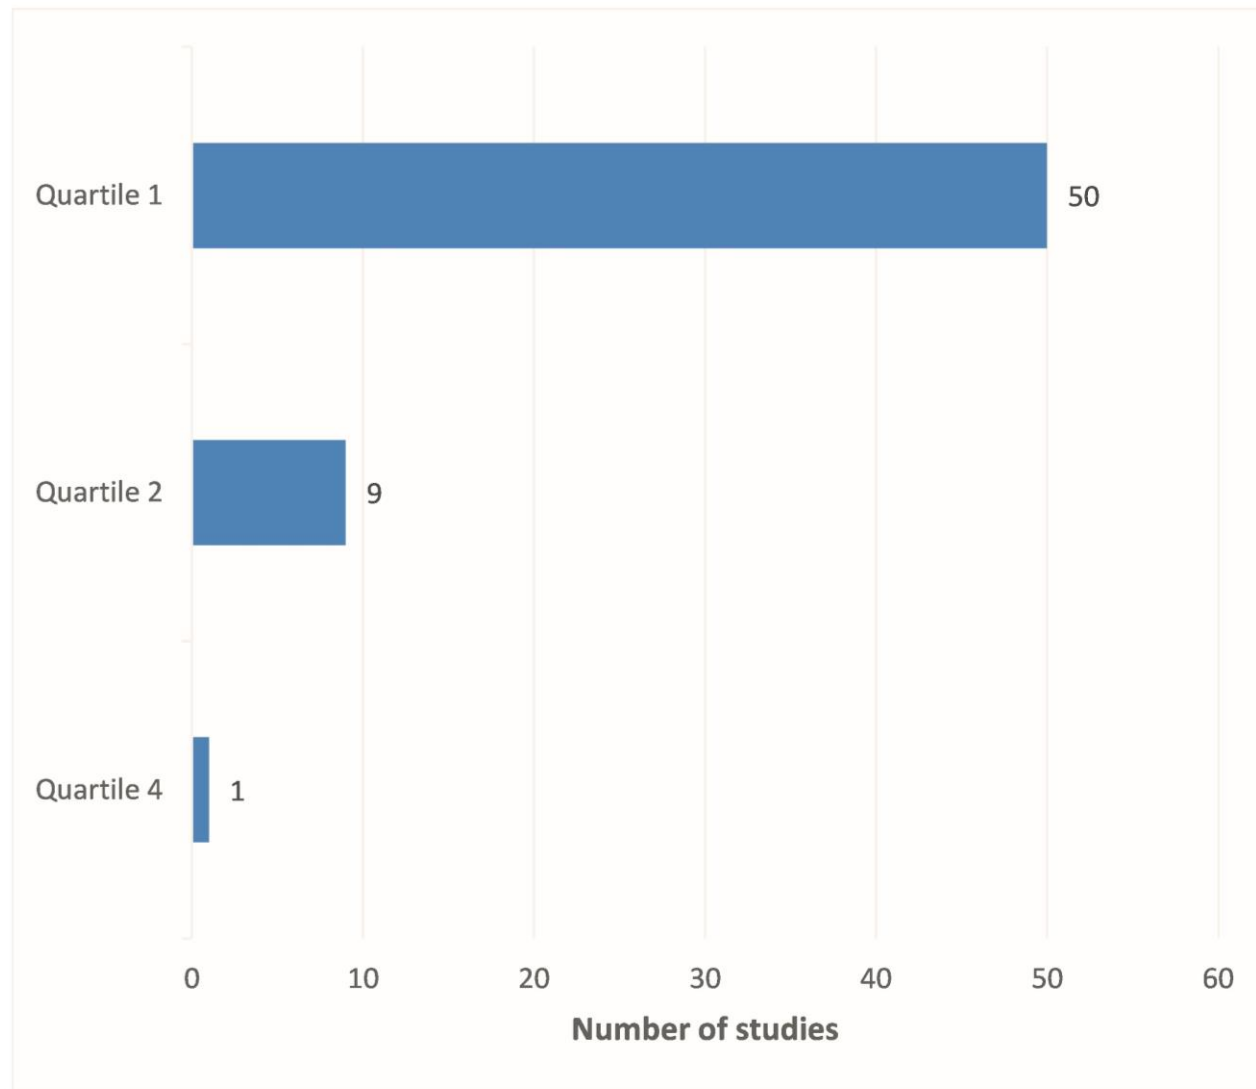

**S5 Figure. Distribution by ranking of the subject area of the journal of publication of studies included. The symbol “-” was used for a journal not indexed in SciMago.**

**S1 Table. The research strategy developed for Ovid MEDLINE and adapted for the other databases.**

| Search               | Query                                                                                                                                                                                                                                                                                                                                                                                                                                                                                                                                                                                                                                                                                                                                                                                                                                                                                                                                                                                                                                                                                                                                                                                                                                                                                                                                                                                                                                                                                                                                                                                                                                                                                                                                                                                                                                                                                                                                                                                                                                                                                                                                                                                                                                                                                                                                                                                                                                                                                                                                                                                                                                                                                                                                    | Items found |
|----------------------|------------------------------------------------------------------------------------------------------------------------------------------------------------------------------------------------------------------------------------------------------------------------------------------------------------------------------------------------------------------------------------------------------------------------------------------------------------------------------------------------------------------------------------------------------------------------------------------------------------------------------------------------------------------------------------------------------------------------------------------------------------------------------------------------------------------------------------------------------------------------------------------------------------------------------------------------------------------------------------------------------------------------------------------------------------------------------------------------------------------------------------------------------------------------------------------------------------------------------------------------------------------------------------------------------------------------------------------------------------------------------------------------------------------------------------------------------------------------------------------------------------------------------------------------------------------------------------------------------------------------------------------------------------------------------------------------------------------------------------------------------------------------------------------------------------------------------------------------------------------------------------------------------------------------------------------------------------------------------------------------------------------------------------------------------------------------------------------------------------------------------------------------------------------------------------------------------------------------------------------------------------------------------------------------------------------------------------------------------------------------------------------------------------------------------------------------------------------------------------------------------------------------------------------------------------------------------------------------------------------------------------------------------------------------------------------------------------------------------------------|-------------|
| Final research block | ((((("1990/01/01"[Date - Publication] : "2017/01/18"[Date - Publication])) AND ((italy OR italian))) AND (((Toxicities, Drug OR Drug Toxicities OR Toxicity, Drug OR Drug Toxicity OR Reactions, Adverse Drug OR Drug Reactions, Adverse OR Drug Reaction, Adverse OR Adverse Drug Reactions OR Adverse Drug Reaction OR Side Effects, Drug OR Side Effects, Drug OR Effects, Drug Side OR Drug Side Effect OR Drug Side Effects OR Side Effects of Drugs OR Drug Events, Adverse OR Drug Event, Adverse OR Adverse Drug Events OR Drug Related Side Effects and Adverse Reactions OR Adverse Drug Event OR drug safety OR toxicity)) OR (((((((hypersensitivity) OR allergy) OR nephotoxicity) OR allergic) OR atopy) OR "hypersensitivity"[MeSH Major Topic]) OR "renal insufficiency"[MeSH Major Topic])) OR (Electrocardiogram abnormal OR Electrocardiogram ST segment elevation OR Thirst OR Malaise OR Fatigue OR Coldness local OR Injection site reaction** OR Renal failure OR Arthralgia OR Sweating increased OR Cold sweat OR Angioedema OR Salivary gland enlargement OR Dysphagia OR Salivary hypersecretion OR Abdominal pain OR Diarrhoea OR Dysphonia OR Rhinitis OR Laryngeal discomfort OR Pharynx discomfort OR Hyperventilation OR Cough OR Asthma OR Bronchospasm OR Pharyngeal oedema OR Laryngeal oedema OR Pulmonary oedema OR Acute respiratory distress syndrome (ARDS) OR Respiratory arrest OR Pallor OR Flushing OR Hot flush OR Circulatory collapse or shock OR Cyanosis OR Palpitations OR Atrioventricular block OR Ventricular or atrial fibrillation OR Arrhythmia OR Angina pectoris OR Cardiac failure OR Myocardial infarction OR Cardiac arrest OR Photopsia OR Lacrimation increased OR Conjunctivitis OR Visual disturbance OR Blindness transient OR Taste abnormality OR Somnolence OR Amnesia OR Paraesthesia OR Dysarthria OR Loss of consciousness OR Convulsion OR Syncope OR Paralysis OR Transient ischaemic attack OR Coma OR Confusional state OR Anxiety OR Anaphylactoid reaction))) AND ((MS-325 OR Gd-DOTA OR Gd-BT-D03A OR Gd-EOB-DTPA OR Gd-DTPA-BMEA OR Gd-DTPA-BMA OR Gd-BOPTA OR Gd-HP-D03A OR Gd-DTPA Linear Ionic OR iopamidol OR iohexol OR iothalamate OR diatrizoate OR barium sulfate OR ferrous-ferric oxide ferumoxsil OR iohexol OR iohexol OR iohexol OR iodipamide OR diatrizoate OR iopamidol OR ioxilan OR iohexol OR ioversol OR iodixanol OR ioversol OR ioxaglate meglumine OR iopromide OR ioxilan OR ioversol OR iohexol OR iopamidol OR iothalamate OR iodixanol OR iopamidol OR iopromide OR ioversol OR iohexol OR iothalamate OR iopamidol OR iohexol OR iopromide OR Iohexol OR iothalamate OR contrast media OR iodate OR iodinate OR gadolinium)) | 984         |

|         |                                                                                                                                                                                                                                                                                                                                                                                                                                                                                                                                                                                                                                                                                                                                                                                                                                                                                                                                                                                                                                                                                                                                                                                                                                                                                                                                                                                                                                                                                                                                                                                                                                                                                                                                                                                                                                                                                                                                   |          |
|---------|-----------------------------------------------------------------------------------------------------------------------------------------------------------------------------------------------------------------------------------------------------------------------------------------------------------------------------------------------------------------------------------------------------------------------------------------------------------------------------------------------------------------------------------------------------------------------------------------------------------------------------------------------------------------------------------------------------------------------------------------------------------------------------------------------------------------------------------------------------------------------------------------------------------------------------------------------------------------------------------------------------------------------------------------------------------------------------------------------------------------------------------------------------------------------------------------------------------------------------------------------------------------------------------------------------------------------------------------------------------------------------------------------------------------------------------------------------------------------------------------------------------------------------------------------------------------------------------------------------------------------------------------------------------------------------------------------------------------------------------------------------------------------------------------------------------------------------------------------------------------------------------------------------------------------------------|----------|
| Block 4 | Search ("1990/01/01"[Date - Publication] : "2017/01/18"[Date - Publication])                                                                                                                                                                                                                                                                                                                                                                                                                                                                                                                                                                                                                                                                                                                                                                                                                                                                                                                                                                                                                                                                                                                                                                                                                                                                                                                                                                                                                                                                                                                                                                                                                                                                                                                                                                                                                                                      | 17922109 |
| Block 3 | Search (Italy OR Italian)                                                                                                                                                                                                                                                                                                                                                                                                                                                                                                                                                                                                                                                                                                                                                                                                                                                                                                                                                                                                                                                                                                                                                                                                                                                                                                                                                                                                                                                                                                                                                                                                                                                                                                                                                                                                                                                                                                         | 896641   |
| Block 2 | ((((Toxicities, Drug OR Drug Toxicities OR Toxicity, Drug OR Drug Toxicity OR Reactions, Adverse Drug OR Drug Reactions, Adverse OR Drug Reaction, Adverse OR Adverse Drug Reactions OR Adverse Drug Reaction OR Side Effects, Drug OR Side Effects, Drug OR Effects, Drug Side OR Drug Side Effect OR Drug Side Effects OR Side Effects of Drugs OR Drug Events, Adverse OR Drug Event, Adverse OR Adverse Drug Events OR Drug Related Side Effects and Adverse Reactions OR Adverse Drug Event OR drug safety OR toxicity)) OR ((((((hypersensitivity) OR allergy) OR nephrotoxicity) OR allergic) OR atopy) OR "hypersensitivity"[MeSH Major Topic]) OR "renal insufficiency"[MeSH Major Topic])) OR (Electrocardiogram abnormal OR Electrocardiogram ST segment elevation OR Thirst OR Malaise OR Fatigue OR Coldness local OR Injection site reaction** OR Renal failure OR Arthralgia OR Sweating increased OR Cold sweat OR Angioedema OR Salivary gland enlargement OR Dysphagia OR Salivary hypersecretion OR Abdominal pain OR Diarrhoea OR Dysphonia OR Rhinitis OR Laryngeal discomfort OR Pharynx discomfort OR Hyperventilation OR Cough OR Asthma OR Bronchospasm OR Pharyngeal oedema OR Laryngeal oedema OR Pulmonary oedema OR Acute respiratory distress syndrome (ARDS) OR Respiratory arrest OR Pallor OR Flushing OR Hot flush OR Circulatory collapse or shock OR Cyanosis OR Palpitations OR Atrioventricular block OR Ventricular or atrial fibrillation OR Arrhythmia OR Angina pectoris OR Cardiac failure OR Myocardial infarction OR Cardiac arrest OR Photopsia OR Lacrimation increased OR Conjunctivitis OR Visual disturbance OR Blindness transient OR Taste abnormality OR Somnolence OR Amnesia OR Paraesthesia OR Dysarthria OR Loss of consciousness OR Convulsion OR Syncope OR Paralysis OR Transient ischaemic attack OR Coma OR Confusional state OR Anxiety OR Anaphylactoid reaction) | 3098793  |
| Block 1 | (MS-325 OR Gd-DOTA OR Gd-BT-D03A OR Gd-EOB-DTPA OR Gd-DTPA-BMEA OR Gd-DTPA-BMA OR Gd-BOPTA OR Gd-HP-D03A OR Gd-DTPA Linear Ionic OR iopamidol OR iohexol OR iothalamate OR diatrizoate OR barium sulfate OR ferrous-ferric oxide ferumoxsil OR iohexol OR iohexol OR iohexol OR iodipamide OR diatrizoate OR iopamidol OR ioxilan OR iohexol OR ioversol OR iodixanol OR ioversol OR ioxaglate meglumine OR iopromide OR ioxilan OR ioversol OR iohexol OR iopamidol OR iothalamate OR iodixanol OR iopamidol OR iopromide OR ioversol OR iohexol OR iothalamate OR iopamidol OR iohexol OR iopromide OR Iohexol OR iothalamate OR contrast media OR iodate OR iodinate OR gadolinium)                                                                                                                                                                                                                                                                                                                                                                                                                                                                                                                                                                                                                                                                                                                                                                                                                                                                                                                                                                                                                                                                                                                                                                                                                                            | 143949   |

## S2 Table. PRISMA checklist.

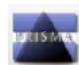

### PRISMA 2009 Checklist

| Section/topic                      | #  | Checklist item                                                                                                                                                                                                                                                                                              | Reported on page # |
|------------------------------------|----|-------------------------------------------------------------------------------------------------------------------------------------------------------------------------------------------------------------------------------------------------------------------------------------------------------------|--------------------|
| <b>TITLE</b>                       |    |                                                                                                                                                                                                                                                                                                             |                    |
| Title                              | 1  | Identify the report as a systematic review, meta-analysis, or both.                                                                                                                                                                                                                                         | 1                  |
| <b>ABSTRACT</b>                    |    |                                                                                                                                                                                                                                                                                                             |                    |
| Structured summary                 | 2  | Provide a structured summary including, as applicable: background; objectives; data sources; study eligibility criteria, participants, and interventions; study appraisal and synthesis methods; results; limitations; conclusions and implications of key findings; systematic review registration number. | 2                  |
| <b>INTRODUCTION</b>                |    |                                                                                                                                                                                                                                                                                                             |                    |
| Rationale                          | 3  | Describe the rationale for the review in the context of what is already known.                                                                                                                                                                                                                              | 3                  |
| Objectives                         | 4  | Provide an explicit statement of questions being addressed with reference to participants, interventions, comparisons, outcomes, and study design (PICOS).                                                                                                                                                  | 3                  |
| <b>METHODS</b>                     |    |                                                                                                                                                                                                                                                                                                             |                    |
| Protocol and registration          | 5  | Indicate if a review protocol exists, if and where it can be accessed (e.g., Web address), and, if available, provide registration information including registration number.                                                                                                                               | NA                 |
| Eligibility criteria               | 6  | Specify study characteristics (e.g., PICOS, length of follow-up) and report characteristics (e.g., years considered, language, publication status) used as criteria for eligibility, giving rationale.                                                                                                      | 4                  |
| Information sources                | 7  | Describe all information sources (e.g., databases with dates of coverage, contact with study authors to identify additional studies) in the search and date last searched.                                                                                                                                  | 4                  |
| Search                             | 8  | Present full electronic search strategy for at least one database, including any limits used, such that it could be repeated.                                                                                                                                                                               | 4 + S1 Table       |
| Study selection                    | 9  | State the process for selecting studies (i.e., screening, eligibility, included in systematic review, and, if applicable, included in the meta-analysis).                                                                                                                                                   | 5                  |
| Data collection process            | 10 | Describe method of data extraction from reports (e.g., piloted forms, independently, in duplicate) and any processes for obtaining and confirming data from investigators.                                                                                                                                  | 5                  |
| Data items                         | 11 | List and define all variables for which data were sought (e.g., PICOS, funding sources) and any assumptions and simplifications made.                                                                                                                                                                       | 5                  |
| Risk of bias in individual studies | 12 | Describe methods used for assessing risk of bias of individual studies (including specification of whether this was done at the study or outcome level), and how this information is to be used in any data synthesis.                                                                                      | NA                 |
| Summary measures                   | 13 | State the principal summary measures (e.g., risk ratio, difference in means).                                                                                                                                                                                                                               | 5                  |
| Synthesis of results               | 14 | Describe the methods of handling data and combining results of studies, if done, including measures of consistency (e.g., $I^2$ ) for each meta-analysis.                                                                                                                                                   | 5                  |



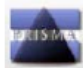

## PRISMA 2009 Checklist

| Section/topic                 | #  | Checklist item                                                                                                                                                                                           | Reported on page # |
|-------------------------------|----|----------------------------------------------------------------------------------------------------------------------------------------------------------------------------------------------------------|--------------------|
| Risk of bias across studies   | 15 | Specify any assessment of risk of bias that may affect the cumulative evidence (e.g., publication bias, selective reporting within studies).                                                             | NA                 |
| Additional analyses           | 16 | Describe methods of additional analyses (e.g., sensitivity or subgroup analyses, meta-regression), if done, indicating which were pre-specified.                                                         | NA                 |
| <b>RESULTS</b>                |    |                                                                                                                                                                                                          |                    |
| Study selection               | 17 | Give numbers of studies screened, assessed for eligibility, and included in the review, with reasons for exclusions at each stage, ideally with a flow diagram.                                          | 5                  |
| Study characteristics         | 18 | For each study, present characteristics for which data were extracted (e.g., study size, PICOS, follow-up period) and provide the citations.                                                             | S1 app.            |
| Risk of bias within studies   | 19 | Present data on risk of bias of each study and, if available, any outcome level assessment (see item 12).                                                                                                | NA                 |
| Results of individual studies | 20 | For all outcomes considered (benefits or harms), present, for each study: (a) simple summary data for each intervention group (b) effect estimates and confidence intervals, ideally with a forest plot. | S1 app.            |
| Synthesis of results          | 21 | Present results of each meta-analysis done, including confidence intervals and measures of consistency.                                                                                                  | 6-23               |
| Risk of bias across studies   | 22 | Present results of any assessment of risk of bias across studies (see Item 15).                                                                                                                          | NA                 |
| Additional analysis           | 23 | Give results of additional analyses, if done (e.g., sensitivity or subgroup analyses, meta-regression [see Item 16]).                                                                                    | NA                 |
| <b>DISCUSSION</b>             |    |                                                                                                                                                                                                          |                    |
| Summary of evidence           | 24 | Summarize the main findings including the strength of evidence for each main outcome; consider their relevance to key groups (e.g., healthcare providers, users, and policy makers).                     | 24                 |
| Limitations                   | 25 | Discuss limitations at study and outcome level (e.g., risk of bias), and at review-level (e.g., incomplete retrieval of identified research, reporting bias).                                            | 24                 |
| Conclusions                   | 26 | Provide a general interpretation of the results in the context of other evidence, and implications for future research.                                                                                  | 26                 |
| <b>FUNDING</b>                |    |                                                                                                                                                                                                          |                    |
| Funding                       | 27 | Describe sources of funding for the systematic review and other support (e.g., supply of data); role of funders for the systematic review.                                                               | NA                 |

From: Moher D, Liberati A, Tetzlaff J, Altman DG, The PRISMA Group (2009). Preferred Reporting Items for Systematic Reviews and Meta-Analyses: The PRISMA Statement. PLoS Med 6(7): e1000097. doi:10.1371/journal.pmed1000097

For more information, visit: [www.prisma-statement.org](http://www.prisma-statement.org).

**S1 Appendix. Meta-analyses, observational studies, and clinical trials assessing contrast-induced nephropathy as clinical outcome for which were involved Italian researchers among those published in the scientific literature from January 1990 to January 2017.**

**Valente 2006<sup>67</sup>**

|                                     |                                                               |
|-------------------------------------|---------------------------------------------------------------|
| <b>ID:</b>                          | 1                                                             |
| <b>Year of publication:</b>         | 2006                                                          |
| <b>Italian Region/s involved:</b>   | Toscana                                                       |
| <b>The title of the manuscript:</b> | Contrast-induced nephropathy in urgent coronary interventions |
| <b>Study design:</b>                | Cohort study                                                  |
| <b>Mono-/Multi-center:</b>          | Mono-center                                                   |
| <b>The level of evidence:</b>       | III-2                                                         |
| <b>Funding:</b>                     | No                                                            |
| <b>Conflict of interest:</b>        | No                                                            |
| <b>External collaboration:</b>      | No                                                            |
| <b>Journal:</b>                     | Journal of Cardiovascular Medicine                            |
| <b>Topic:</b>                       | Cardiology and Cardiovascular Medicine                        |
| <b>Ranking:</b>                     | 134                                                           |

**Ranucci 2008<sup>55</sup>**

|                                     |                                                                                                                                  |
|-------------------------------------|----------------------------------------------------------------------------------------------------------------------------------|
| <b>ID:</b>                          | 2                                                                                                                                |
| <b>Year of publication:</b>         | 2008                                                                                                                             |
| <b>Italian Region/s involved:</b>   | Lombardia, Campania                                                                                                              |
| <b>The title of the manuscript:</b> | Influence of the timing of cardiac catheterization and the amount of contrast media on acute renal failure after cardiac surgery |
| <b>Study design:</b>                | Cohort study                                                                                                                     |
| <b>Mono-/Multi-center:</b>          | Multi-center                                                                                                                     |
| <b>The level of evidence:</b>       | III-2                                                                                                                            |
| <b>Funding:</b>                     | Yes                                                                                                                              |
| <b>Conflict of interest:</b>        | No                                                                                                                               |
| <b>External collaboration:</b>      | Yes                                                                                                                              |
| <b>Journal:</b>                     | Journal of the American College of Cardiology                                                                                    |
| <b>Topic:</b>                       | Cardiology and Cardiovascular Medicine                                                                                           |
| <b>Ranking:</b>                     | 1                                                                                                                                |

**Marenzi 2004<sup>62</sup>**

|                                     |                                                                                                         |
|-------------------------------------|---------------------------------------------------------------------------------------------------------|
| <b>ID:</b>                          | 3                                                                                                       |
| <b>Year of publication:</b>         | 2004                                                                                                    |
| <b>Italian Region/s involved:</b>   | Lombardia                                                                                               |
| <b>The title of the manuscript:</b> | Contrast-induced nephropathy in patients undergoing primary angioplasty for acute myocardial infarction |
| <b>Study design:</b>                | Cohort study                                                                                            |
| <b>Mono-/Multi-center:</b>          | Mono-center                                                                                             |
| <b>The level of evidence:</b>       | III-2                                                                                                   |
| <b>Funding:</b>                     | No                                                                                                      |
| <b>Conflict of interest:</b>        | No                                                                                                      |
| <b>External collaboration:</b>      | No                                                                                                      |
| <b>Journal:</b>                     | Journal of the American College of Cardiology                                                           |
| <b>Topic:</b>                       | Cardiology and Cardiovascular Medicine                                                                  |
| <b>Ranking:</b>                     | 1                                                                                                       |

**Marenzi 2010<sup>56</sup>**

|                                     |                                                                                                    |
|-------------------------------------|----------------------------------------------------------------------------------------------------|
| <b>ID:</b>                          | 4                                                                                                  |
| <b>Year of publication:</b>         | 2010                                                                                               |
| <b>Italian Region/s involved:</b>   | Lombardia                                                                                          |
| <b>The title of the manuscript:</b> | Acute hyperglycemia and contrast-induced nephropathy in primary percutaneous coronary intervention |
| <b>Study design:</b>                | Cohort study                                                                                       |
| <b>Mono-/Multi-center:</b>          | Mono-center                                                                                        |
| <b>The level of evidence:</b>       | III-2                                                                                              |
| <b>Funding:</b>                     | No                                                                                                 |
| <b>Conflict of interest:</b>        | No                                                                                                 |
| <b>External collaboration:</b>      | No                                                                                                 |
| <b>Journal:</b>                     | American Heart Journal                                                                             |
| <b>Topic:</b>                       | Cardiology and Cardiovascular Medicine                                                             |
| <b>Ranking:</b>                     | 19                                                                                                 |

**Marenzi 2009<sup>53</sup>**

|                                     |                                                                                                                             |
|-------------------------------------|-----------------------------------------------------------------------------------------------------------------------------|
| <b>ID:</b>                          | 5                                                                                                                           |
| <b>Year of publication:</b>         | 2009                                                                                                                        |
| <b>Italian Region/s involved:</b>   | Lombardia                                                                                                                   |
| <b>The title of the manuscript:</b> | Contrast volume during primary percutaneous coronary intervention and subsequent contrast-induced nephropathy and mortality |
| <b>Study design:</b>                | Cohort study                                                                                                                |
| <b>Mono-/Multi-center:</b>          | Mono-center                                                                                                                 |
| <b>The level of evidence:</b>       | III-2                                                                                                                       |
| <b>Funding:</b>                     | Yes                                                                                                                         |
| <b>Conflict of interest:</b>        | No                                                                                                                          |
| <b>External collaboration:</b>      | No                                                                                                                          |
| <b>Journal:</b>                     | Annals of Internal Medicine                                                                                                 |
| <b>Topic:</b>                       | Internal Medicine                                                                                                           |
| <b>Ranking:</b>                     | 4                                                                                                                           |

|                                     |                                                                                                                       |
|-------------------------------------|-----------------------------------------------------------------------------------------------------------------------|
| <b>ID:</b>                          | 6                                                                                                                     |
| <b>Year of publication:</b>         | 2012                                                                                                                  |
| <b>Italian Region/s involved:</b>   | Toscana                                                                                                               |
| <b>The title of the manuscript:</b> | Persistent renal damage after contrast-induced acute kidney injury: incidence, evolution, risk factors, and prognosis |
| <b>Study design:</b>                | Cohort study                                                                                                          |
| <b>Mono-/Multi-center:</b>          | Mono-center                                                                                                           |
| <b>The level of evidence:</b>       | III-2                                                                                                                 |
| <b>Funding:</b>                     | No                                                                                                                    |
| <b>Conflict of interest:</b>        | No                                                                                                                    |
| <b>External collaboration:</b>      | No                                                                                                                    |
| <b>Journal:</b>                     | Circulation                                                                                                           |
| <b>Topic:</b>                       | Cardiology and Cardiovascular Medicine                                                                                |
| <b>Ranking:</b>                     | 2                                                                                                                     |

**Maioli 2010<sup>76</sup>**

|                                     |                                                                                                                |
|-------------------------------------|----------------------------------------------------------------------------------------------------------------|
| <b>ID:</b>                          | 7                                                                                                              |
| <b>Year of publication:</b>         | 2010                                                                                                           |
| <b>Italian Region/s involved:</b>   | Toscana                                                                                                        |
| <b>The title of the manuscript:</b> | Preprocedural score for risk of contrast-induced nephropathy in elective coronary angiography and intervention |
| <b>Study design:</b>                | Cohort study                                                                                                   |
| <b>Mono-/Multi-center:</b>          | Mono-center                                                                                                    |
| <b>The level of evidence:</b>       | III-2                                                                                                          |
| <b>Funding:</b>                     | No                                                                                                             |
| <b>Conflict of interest:</b>        | No                                                                                                             |
| <b>External collaboration:</b>      | No                                                                                                             |
| <b>Journal:</b>                     | Journal of Cardiovascular Medicine                                                                             |
| <b>Topic:</b>                       | Medicine (miscellaneous)                                                                                       |
| <b>Ranking:</b>                     | 831                                                                                                            |



**Lucreziotti 2014<sup>59</sup>**

|                                     |                                                                                                                                    |
|-------------------------------------|------------------------------------------------------------------------------------------------------------------------------------|
| <b>ID:</b>                          | 8                                                                                                                                  |
| <b>Year of publication:</b>         | 2014                                                                                                                               |
| <b>Italian Region/s involved:</b>   | Lombardia                                                                                                                          |
| <b>The title of the manuscript:</b> | Female gender and contrast-induced nephropathy in primary percutaneous intervention for ST-segment elevation myocardial infarction |
| <b>Study design:</b>                | Cohort study                                                                                                                       |
| <b>Mono-/Multi-center:</b>          | Mono-center                                                                                                                        |
| <b>The level of evidence:</b>       | III-2                                                                                                                              |
| <b>Funding:</b>                     | No                                                                                                                                 |
| <b>Conflict of interest:</b>        | No                                                                                                                                 |
| <b>External collaboration:</b>      | No                                                                                                                                 |
| <b>Journal:</b>                     | International Journal of Cardiology                                                                                                |
| <b>Topic:</b>                       | Cardiology and Cardiovascular Medicine                                                                                             |
| <b>Ranking:</b>                     | 81                                                                                                                                 |

**La Manna 2010<sup>41</sup>**

|                                     |                                                                     |
|-------------------------------------|---------------------------------------------------------------------|
| <b>ID:</b>                          | 9                                                                   |
| <b>Year of publication:</b>         | 2010                                                                |
| <b>Italian Region/s involved:</b>   | Emilia Romagna                                                      |
| <b>The title of the manuscript:</b> | Risk for contrast nephropathy in patients undergoing coronarography |
| <b>Study design:</b>                | Cohort study                                                        |
| <b>Mono-/Multi-center:</b>          | Mono-center                                                         |
| <b>The level of evidence:</b>       | III-2                                                               |
| <b>Funding:</b>                     | Yes                                                                 |
| <b>Conflict of interest:</b>        | No                                                                  |
| <b>External collaboration:</b>      | No                                                                  |
| <b>Journal:</b>                     | Artificial Organs                                                   |
| <b>Topic:</b>                       | Medicine (miscellaneous)                                            |
| <b>Ranking:</b>                     | 132                                                                 |

**Russo 1995<sup>65</sup>**

|                                     |                                                                                                     |
|-------------------------------------|-----------------------------------------------------------------------------------------------------|
| <b>ID:</b>                          | 10                                                                                                  |
| <b>Year of publication:</b>         | 1995                                                                                                |
| <b>Italian Region/s involved:</b>   | Campania                                                                                            |
| <b>The title of the manuscript:</b> | Early effects of contrast media on renal hemodynamics and tubular function in chronic renal failure |
| <b>Study design:</b>                | Cohort study                                                                                        |
| <b>Mono-/Multi-center:</b>          | Multi-center                                                                                        |
| <b>The level of evidence:</b>       | III-2                                                                                               |
| <b>Funding:</b>                     | Yes                                                                                                 |
| <b>Conflict of interest:</b>        | No                                                                                                  |
| <b>External collaboration:</b>      | No                                                                                                  |
| <b>Journal:</b>                     | Journal of Americal Society of Nephrology                                                           |
| <b>Topic:</b>                       | Medicine (miscellaneous)                                                                            |
| <b>Ranking:</b>                     | 34                                                                                                  |

**Quintavalle 2012<sup>22</sup>**

|                                     |                                                                                       |
|-------------------------------------|---------------------------------------------------------------------------------------|
| <b>ID:</b>                          | 11                                                                                    |
| <b>Year of publication:</b>         | 2012                                                                                  |
| <b>Italian Region/s involved:</b>   | Campania, Lombardia                                                                   |
| <b>The title of the manuscript:</b> | Impact of a high loading dose of atorvastatin on contrast-induced acute kidney injury |
| <b>Study design:</b>                | Post-hoc Randomized clinical trial                                                    |
| <b>Mono-/Multi-center:</b>          | Multi-center                                                                          |
| <b>The level of evidence:</b>       | II                                                                                    |
| <b>Funding:</b>                     | Yes                                                                                   |
| <b>Conflict of interest:</b>        | No                                                                                    |
| <b>External collaboration:</b>      | No                                                                                    |
| <b>Journal:</b>                     | Circulation                                                                           |
| <b>Topic:</b>                       | Cardiology and Cardiovascular Medicine                                                |
| <b>Ranking:</b>                     | 2                                                                                     |

**Tropeano 2015<sup>25</sup>**

|                                     |                                                                                                                          |
|-------------------------------------|--------------------------------------------------------------------------------------------------------------------------|
| <b>ID:</b>                          | 12                                                                                                                       |
| <b>Year of publication:</b>         | 2015                                                                                                                     |
| <b>Italian Region/s involved:</b>   | Toscana                                                                                                                  |
| <b>The title of the manuscript:</b> | Impact of rosuvastatin in contrast-induced acute kidney injury in the elderly: post hoc analysis of the prato-acis trial |
| <b>Study design:</b>                | Post-hoc Randomized clinical trial                                                                                       |
| <b>Mono-/Multi-center:</b>          | Mono-center                                                                                                              |
| <b>The level of evidence:</b>       | II                                                                                                                       |
| <b>Funding:</b>                     | No                                                                                                                       |
| <b>Conflict of interest:</b>        | No                                                                                                                       |
| <b>External collaboration:</b>      | No                                                                                                                       |
| <b>Journal:</b>                     | Journal of Cardiovascular Pharmacology and Therapeutics                                                                  |
| <b>Topic:</b>                       | Cardiology and Cardiovascular Medicine Pharmacology (medical)                                                            |
| <b>Ranking:</b>                     | 79                                                                                                                       |

**Toso 2010<sup>26</sup>**

|                                     |                                                                                                                         |
|-------------------------------------|-------------------------------------------------------------------------------------------------------------------------|
| <b>ID:</b>                          | 13                                                                                                                      |
| <b>Year of publication:</b>         | 2010                                                                                                                    |
| <b>Italian Region/s involved:</b>   | Toscana                                                                                                                 |
| <b>The title of the manuscript:</b> | Usefulness of atorvastatin (80 mg) in prevention of contrast-induced nephropathy in patients with chronic renal disease |
| <b>Study design:</b>                | Randomized clinical trial                                                                                               |
| <b>Mono-/Multi-center:</b>          | Mono-center                                                                                                             |
| <b>The level of evidence:</b>       | II                                                                                                                      |
| <b>Funding:</b>                     | No                                                                                                                      |
| <b>Conflict of interest:</b>        | No                                                                                                                      |
| <b>External collaboration:</b>      | No                                                                                                                      |
| <b>Journal:</b>                     | Journal of the American College of Cardiology                                                                           |
| <b>Topic:</b>                       | Cardiology and Cardiovascular Medicine                                                                                  |
| <b>Ranking:</b>                     | 1                                                                                                                       |

|                                     |                                                                                                                                                         |
|-------------------------------------|---------------------------------------------------------------------------------------------------------------------------------------------------------|
| <b>ID:</b>                          | 14                                                                                                                                                      |
| <b>Year of publication:</b>         | 2014                                                                                                                                                    |
| <b>Italian Region/s involved:</b>   | Toscana, Lombardia                                                                                                                                      |
| <b>The title of the manuscript:</b> | Relationship between inflammation and benefits of early high-dose rosuvastatin on contrast-induced nephropathy in patients with acute coronary syndrome |
| <b>Study design:</b>                | Post-hoc Randomized clinical trial                                                                                                                      |
| <b>Mono-/Multi-center:</b>          | Mono-center                                                                                                                                             |
| <b>The level of evidence:</b>       | II                                                                                                                                                      |
| <b>Funding:</b>                     | Yes                                                                                                                                                     |
| <b>Conflict of interest:</b>        | No                                                                                                                                                      |
| <b>External collaboration:</b>      | No                                                                                                                                                      |
| <b>Journal:</b>                     | JACC: Cardiovascular Interventions                                                                                                                      |
| <b>Topic:</b>                       | Cardiology and Cardiovascular Medicine                                                                                                                  |
| <b>Ranking:</b>                     | 5                                                                                                                                                       |

**Marenzi 2015<sup>29</sup>**

|                                     |                                                                                                                                                                             |
|-------------------------------------|-----------------------------------------------------------------------------------------------------------------------------------------------------------------------------|
| <b>ID:</b>                          | 15                                                                                                                                                                          |
| <b>Year of publication:</b>         | 2015                                                                                                                                                                        |
| <b>Italian Region/s involved:</b>   | Lombardia                                                                                                                                                                   |
| <b>The title of the manuscript:</b> | A meta-analysis of randomized controlled trials of statins for the prevention of contrast-induced acute kidney injury in patients with and without acute coronary syndromes |
| <b>Study design:</b>                | Meta-analysis                                                                                                                                                               |
| <b>Mono-/Multi-center:</b>          | -                                                                                                                                                                           |
| <b>The level of evidence:</b>       | I                                                                                                                                                                           |
| <b>Funding:</b>                     | Yes                                                                                                                                                                         |
| <b>Conflict of interest:</b>        | No                                                                                                                                                                          |
| <b>External collaboration:</b>      | No                                                                                                                                                                          |
| <b>Journal:</b>                     | International Journal of Cardiology                                                                                                                                         |
| <b>Topic:</b>                       | Cardiology and Cardiovascular Medicine                                                                                                                                      |
| <b>Ranking:</b>                     | 81                                                                                                                                                                          |



**Quintavalle 2015<sup>72</sup>**

|                                     |                                                                                     |
|-------------------------------------|-------------------------------------------------------------------------------------|
| <b>ID:</b>                          | 16                                                                                  |
| <b>Year of publication:</b>         | 2015                                                                                |
| <b>Italian Region/s involved:</b>   | Campania, Lombardia                                                                 |
| <b>The title of the manuscript:</b> | Neutrophil gelatinase-associated lipocalin and contrast-induced acute kidney injury |
| <b>Study design:</b>                | Post-hoc Randomized clinical trial                                                  |
| <b>Mono-/Multi-center:</b>          | Multi-center                                                                        |
| <b>The level of evidence:</b>       | II                                                                                  |
| <b>Funding:</b>                     | Yes                                                                                 |
| <b>Conflict of interest:</b>        | No                                                                                  |
| <b>External collaboration:</b>      | No                                                                                  |
| <b>Journal:</b>                     | Circulation: Cardiovascular Interventions                                           |
| <b>Topic:</b>                       | Cardiology and Cardiovascular Medicine                                              |
| <b>Ranking:</b>                     | 8                                                                                   |

**Ribichini 2010<sup>77</sup>**

|                                     |                                                                                                            |
|-------------------------------------|------------------------------------------------------------------------------------------------------------|
| <b>ID:</b>                          | 17                                                                                                         |
| <b>Year of publication:</b>         | 2010                                                                                                       |
| <b>Italian Region/s involved:</b>   | Veneto, Lazio, Piemonte                                                                                    |
| <b>The title of the manuscript:</b> | Early creatinine shifts predict contrast-induced nephropathy and persistent renal damage after angiography |
| <b>Study design:</b>                | Cohort study                                                                                               |
| <b>Mono-/Multi-center:</b>          | Mono-center                                                                                                |
| <b>The level of evidence:</b>       | III-2                                                                                                      |
| <b>Funding:</b>                     | No                                                                                                         |
| <b>Conflict of interest:</b>        | No                                                                                                         |
| <b>External collaboration:</b>      | Yes                                                                                                        |
| <b>Journal:</b>                     | American Journal of Medicine                                                                               |
| <b>Topic:</b>                       | Medicine (miscellaneous)                                                                                   |
| <b>Ranking:</b>                     | 115                                                                                                        |

**Guagliumi 2014<sup>70</sup>**

|                                     |                                                                                                                               |
|-------------------------------------|-------------------------------------------------------------------------------------------------------------------------------|
| <b>ID:</b>                          | 18                                                                                                                            |
| <b>Year of publication:</b>         | 2014                                                                                                                          |
| <b>Italian Region/s involved:</b>   | Lombardia                                                                                                                     |
| <b>The title of the manuscript:</b> | Contrast-induced acute kidney injury after primary percutaneous coronary intervention: results from the HORIZONS-AMI substudy |
| <b>Study design:</b>                | Post-hoc Randomized clinical trial                                                                                            |
| <b>Mono-/Multi-center:</b>          | Multi-center                                                                                                                  |
| <b>The level of evidence:</b>       | II                                                                                                                            |
| <b>Funding:</b>                     | Yes                                                                                                                           |
| <b>Conflict of interest:</b>        | Yes                                                                                                                           |
| <b>External collaboration:</b>      | Yes                                                                                                                           |
| <b>Journal:</b>                     | European Heart Journal                                                                                                        |
| <b>Topic:</b>                       | Cardiology and Cardiovascular Medicine                                                                                        |
| <b>Ranking:</b>                     | 3                                                                                                                             |

**Preda 2011<sup>66</sup>**

|                                     |                                                                                                    |
|-------------------------------------|----------------------------------------------------------------------------------------------------|
| <b>ID:</b>                          | 19                                                                                                 |
| <b>Year of publication:</b>         | 2011                                                                                               |
| <b>Italian Region/s involved:</b>   | Lombardia                                                                                          |
| <b>The title of the manuscript:</b> | Effect on renal function of an iso-osmolar contrast agent in patients with monoclonal gammopathies |
| <b>Study design:</b>                | Cohort study                                                                                       |
| <b>Mono-/Multi-center:</b>          | Mono-center                                                                                        |
| <b>The level of evidence:</b>       | III - 2                                                                                            |
| <b>Funding:</b>                     | Yes                                                                                                |
| <b>Conflict of interest:</b>        | No                                                                                                 |
| <b>External collaboration:</b>      | No                                                                                                 |
| <b>Journal:</b>                     | European Radiology                                                                                 |
| <b>Topic:</b>                       | Radiology, Nuclear Medicine, and Imaging                                                           |
| <b>Ranking:</b>                     | 17                                                                                                 |

**Marenzi 2003<sup>50</sup>**

|                                     |                                                                                                                                           |
|-------------------------------------|-------------------------------------------------------------------------------------------------------------------------------------------|
| <b>ID:</b>                          | 20                                                                                                                                        |
| <b>Year of publication:</b>         | 2003                                                                                                                                      |
| <b>Italian Region/s involved:</b>   | Lombardia                                                                                                                                 |
| <b>The title of the manuscript:</b> | Continuous veno-venous hemofiltration for the treatment of contrast-induced acute renal failure after percutaneous coronary interventions |
| <b>Study design:</b>                | Cohort study                                                                                                                              |
| <b>Mono-/Multi-center:</b>          | Mono-center                                                                                                                               |
| <b>The level of evidence:</b>       | III - 2                                                                                                                                   |
| <b>Funding:</b>                     | No                                                                                                                                        |
| <b>Conflict of interest:</b>        | No                                                                                                                                        |
| <b>External collaboration:</b>      | No                                                                                                                                        |
| <b>Journal:</b>                     | Catheterization and cardiovascular interventions                                                                                          |
| <b>Topic:</b>                       | Cardiology and Cardiovascular Medicine Radiology, Nuclear Medicine and Imaging                                                            |
| <b>Ranking:</b>                     | 63                                                                                                                                        |

**Marenzi 2012<sup>42</sup>**

|                                     |                                                                         |
|-------------------------------------|-------------------------------------------------------------------------|
| <b>ID:</b>                          | 21                                                                      |
| <b>Year of publication:</b>         | 2012                                                                    |
| <b>Italian Region/s involved:</b>   | Lombardia                                                               |
| <b>The title of the manuscript:</b> | Prevention of contrast nephropathy by furosemide with matched hydration |
| <b>Study design:</b>                | Randomized clinical trial                                               |
| <b>Mono-/Multi-center:</b>          | Mono-center                                                             |
| <b>The level of evidence:</b>       | II                                                                      |
| <b>Funding:</b>                     | Yes                                                                     |
| <b>Conflict of interest:</b>        | No                                                                      |
| <b>External collaboration:</b>      | No                                                                      |
| <b>Journal:</b>                     | JACC: Cardiovascular Interventions                                      |
| <b>Topic:</b>                       | Cardiology and Cardiovascular Medicine                                  |
| <b>Ranking:</b>                     | 5                                                                       |

**Maioli 2011<sup>40</sup>**

|                                     |                                                                                        |
|-------------------------------------|----------------------------------------------------------------------------------------|
| <b>ID:</b>                          | 22                                                                                     |
| <b>Year of publication:</b>         | 2011                                                                                   |
| <b>Italian Region/s involved:</b>   | Toscana                                                                                |
| <b>The title of the manuscript:</b> | Effects of hydration in contrast-induced acute kidney injury after primary angioplasty |
| <b>Study design:</b>                | Randomized clinical trial                                                              |
| <b>Mono-/Multi-center:</b>          | Mono-center                                                                            |
| <b>The level of evidence:</b>       | II                                                                                     |
| <b>Funding:</b>                     | No                                                                                     |
| <b>Conflict of interest:</b>        | No                                                                                     |
| <b>External collaboration:</b>      | No                                                                                     |
| <b>Journal:</b>                     | Circulation: Cardiovascular Interventions                                              |
| <b>Topic:</b>                       | Cardiology and Cardiovascular Medicine                                                 |
| <b>Ranking:</b>                     | 8                                                                                      |

**Limbruno 2014<sup>75</sup>**

|                                     |                                                                                                  |
|-------------------------------------|--------------------------------------------------------------------------------------------------|
| <b>ID:</b>                          | 23                                                                                               |
| <b>Year of publication:</b>         | 2014                                                                                             |
| <b>Italian Region/s involved:</b>   | Abruzzo                                                                                          |
| <b>The title of the manuscript:</b> | Refining the assessment of contrast-induced acute kidney injury: the load-to-damage relationship |
| <b>Study design:</b>                | Cohort study                                                                                     |
| <b>Mono-/Multi-center:</b>          | Mono-center                                                                                      |
| <b>The level of evidence:</b>       | III - 2                                                                                          |
| <b>Funding:</b>                     | No                                                                                               |
| <b>Conflict of interest:</b>        | Yes                                                                                              |
| <b>External collaboration:</b>      | No                                                                                               |
| <b>Journal:</b>                     | Journal of Cardiovascular Medicine                                                               |
| <b>Topic:</b>                       | Medicine (miscellaneous)                                                                         |
| <b>Ranking:</b>                     | 831                                                                                              |



**Leoncini 2014<sup>23</sup>**

|                                     |                                                                                                                                                                                                                                                                 |
|-------------------------------------|-----------------------------------------------------------------------------------------------------------------------------------------------------------------------------------------------------------------------------------------------------------------|
| <b>ID:</b>                          | 24                                                                                                                                                                                                                                                              |
| <b>Year of publication:</b>         | 2014                                                                                                                                                                                                                                                            |
| <b>Italian Region/s involved:</b>   | Toscana, Lombardia                                                                                                                                                                                                                                              |
| <b>The title of the manuscript:</b> | Early high-dose rosuvastatin for contrast-induced nephropathy prevention in acute coronary syndrome: Results from the PRATO-ACS Study (Protective Effect of Rosuvastatin and Antiplatelet Therapy On contrast-induced acute kidney injury and myocardial damage |
| <b>Study design:</b>                | Post-hoc Randomized clinical trial                                                                                                                                                                                                                              |
| <b>Mono-/Multi-center:</b>          | Mono-center                                                                                                                                                                                                                                                     |
| <b>The level of evidence:</b>       | II                                                                                                                                                                                                                                                              |
| <b>Funding:</b>                     | No                                                                                                                                                                                                                                                              |
| <b>Conflict of interest:</b>        | No                                                                                                                                                                                                                                                              |
| <b>External collaboration:</b>      | No                                                                                                                                                                                                                                                              |
| <b>Journal:</b>                     | American Heart Journal                                                                                                                                                                                                                                          |
| <b>Topic:</b>                       | Cardiology and Cardiovascular Medicine                                                                                                                                                                                                                          |
| <b>Ranking:</b>                     | 19                                                                                                                                                                                                                                                              |

**La Manna 2008<sup>44</sup>**

|                                     |                                                                                                                                                                    |
|-------------------------------------|--------------------------------------------------------------------------------------------------------------------------------------------------------------------|
| <b>ID:</b>                          | 25                                                                                                                                                                 |
| <b>Year of publication:</b>         | 2008                                                                                                                                                               |
| <b>Italian Region/s involved:</b>   | Emilia Romagna                                                                                                                                                     |
| <b>The title of the manuscript:</b> | Post-coronarography application of continuous veno-venous hemofiltration in the prevention of contrast nephropathy in patients with complex multisystem deficiency |
| <b>Study design:</b>                | Cohort study                                                                                                                                                       |
| <b>Mono-/Multi-center:</b>          | Mono-center                                                                                                                                                        |
| <b>The level of evidence:</b>       | III - 2                                                                                                                                                            |
| <b>Funding:</b>                     | Yes                                                                                                                                                                |
| <b>Conflict of interest:</b>        | No                                                                                                                                                                 |
| <b>External collaboration:</b>      | No                                                                                                                                                                 |
| <b>Journal:</b>                     | In Vivo                                                                                                                                                            |
| <b>Topic:</b>                       | Medicine (miscellaneous)                                                                                                                                           |
| <b>Ranking:</b>                     | 752                                                                                                                                                                |

|                                     |                                                                                                                                                                         |
|-------------------------------------|-------------------------------------------------------------------------------------------------------------------------------------------------------------------------|
| <b>ID:</b>                          | 26                                                                                                                                                                      |
| <b>Year of publication:</b>         | 2014                                                                                                                                                                    |
| <b>Italian Region/s involved:</b>   | Lombardia                                                                                                                                                               |
| <b>The title of the manuscript:</b> | Continuous venovenous hemofiltration after coronary procedures for the prevention of contrast-induced acute kidney injury in patients with severe chronic renal failure |
| <b>Study design:</b>                | Cohort study                                                                                                                                                            |
| <b>Mono-/Multi-center:</b>          | Mono-center                                                                                                                                                             |
| <b>The level of evidence:</b>       | III - 2                                                                                                                                                                 |
| <b>Funding:</b>                     | No                                                                                                                                                                      |
| <b>Conflict of interest:</b>        | No                                                                                                                                                                      |
| <b>External collaboration:</b>      | No                                                                                                                                                                      |
| <b>Journal:</b>                     | Journal of the American College of Cardiology                                                                                                                           |
| <b>Topic:</b>                       | Cardiology and Cardiovascular Medicine                                                                                                                                  |
| <b>Ranking:</b>                     | 1                                                                                                                                                                       |

**Marenzi 2003<sup>46</sup>**

|                                     |                                                                             |
|-------------------------------------|-----------------------------------------------------------------------------|
| <b>ID:</b>                          | 27                                                                          |
| <b>Year of publication:</b>         | 2003                                                                        |
| <b>Italian Region/s involved:</b>   | Lombardia                                                                   |
| <b>The title of the manuscript:</b> | The prevention of radiocontrast-agent-induced nephropathy by hemofiltration |
| <b>Study design:</b>                | Randomized clinical trial                                                   |
| <b>Mono-/Multi-center:</b>          | Mono-center                                                                 |
| <b>The level of evidence:</b>       | III - 2                                                                     |
| <b>Funding:</b>                     | Yes                                                                         |
| <b>Conflict of interest:</b>        | No                                                                          |
| <b>External collaboration:</b>      | No                                                                          |
| <b>Journal:</b>                     | The New England Journal of Medicine                                         |
| <b>Topic:</b>                       | Medicine (miscellaneous)                                                    |
| <b>Ranking:</b>                     | 4                                                                           |

**Marraccini 2010<sup>63</sup>**

|                                     |                                                                            |
|-------------------------------------|----------------------------------------------------------------------------|
| <b>ID:</b>                          | 28                                                                         |
| <b>Year of publication:</b>         | 2010                                                                       |
| <b>Italian Region/s involved:</b>   | Toscana                                                                    |
| <b>The title of the manuscript:</b> | Contrast medium nephrotoxicity after renal artery and coronary angioplasty |
| <b>Study design:</b>                | Cohort study                                                               |
| <b>Mono-/Multi-center:</b>          | Mono-center                                                                |
| <b>The level of evidence:</b>       | III - 2                                                                    |
| <b>Funding:</b>                     | No                                                                         |
| <b>Conflict of interest:</b>        | No                                                                         |
| <b>External collaboration:</b>      | No                                                                         |
| <b>Journal:</b>                     | Acta Radiologica                                                           |
| <b>Topic:</b>                       | Radiology, Nuclear Medicine, and Imaging                                   |
| <b>Ranking:</b>                     | 83                                                                         |

**Briguori 2011<sup>49</sup>**

|                                     |                                                                                                                                                                  |
|-------------------------------------|------------------------------------------------------------------------------------------------------------------------------------------------------------------|
| <b>ID:</b>                          | 29                                                                                                                                                               |
| <b>Year of publication:</b>         | 2011                                                                                                                                                             |
| <b>Italian Region/s involved:</b>   | Campania, Lombardia, Emilia Romagna                                                                                                                              |
| <b>The title of the manuscript:</b> | Renal Insufficiency After Contrast Media Administration Trial II (REMEDIAL II): RenalGuard System in high-risk patients for contrast-induced acute kidney injury |
| <b>Study design:</b>                | Post-hoc Randomized clinical trial                                                                                                                               |
| <b>Mono-/Multi-center:</b>          | Multi-center                                                                                                                                                     |
| <b>The level of evidence:</b>       | II                                                                                                                                                               |
| <b>Funding:</b>                     | No                                                                                                                                                               |
| <b>Conflict of interest:</b>        | No                                                                                                                                                               |
| <b>External collaboration:</b>      | No                                                                                                                                                               |
| <b>Journal:</b>                     | Circulation                                                                                                                                                      |
| <b>Topic:</b>                       | Cardiology and Cardiovascular Medicine                                                                                                                           |
| <b>Ranking:</b>                     | 2                                                                                                                                                                |

**Briguori 2010<sup>73</sup>**

|                                     |                                                     |
|-------------------------------------|-----------------------------------------------------|
| <b>ID:</b>                          | 30                                                  |
| <b>Year of publication:</b>         | 2010                                                |
| <b>Italian Region/s involved:</b>   | Campania, Lombardia                                 |
| <b>The title of the manuscript:</b> | Cystatin C and contrast-induced acute kidney injury |
| <b>Study design:</b>                | Cohort study                                        |
| <b>Mono-/Multi-center:</b>          | Mono-center                                         |
| <b>The level of evidence:</b>       | III-2                                               |
| <b>Funding:</b>                     | No                                                  |
| <b>Conflict of interest:</b>        | No                                                  |
| <b>External collaboration:</b>      | No                                                  |
| <b>Journal:</b>                     | Circulation                                         |
| <b>Topic:</b>                       | Cardiology and Cardiovascular Medicine              |
| <b>Ranking:</b>                     | 2                                                   |

|                                     |                                                                                                                                                                                                          |
|-------------------------------------|----------------------------------------------------------------------------------------------------------------------------------------------------------------------------------------------------------|
| <b>ID:</b>                          | 31                                                                                                                                                                                                       |
| <b>Year of publication:</b>         | 2016                                                                                                                                                                                                     |
| <b>Italian Region/s involved:</b>   | Lombardia                                                                                                                                                                                                |
| <b>The title of the manuscript:</b> | A comparison between two different definitions of contrast-induced acute kidney injury in patients with ST-segment elevation myocardial infarction undergoing primary percutaneous coronary intervention |
| <b>Study design:</b>                | Cohort study                                                                                                                                                                                             |
| <b>Mono-/Multi-center:</b>          | Mono-center                                                                                                                                                                                              |
| <b>The level of evidence:</b>       | III - 2                                                                                                                                                                                                  |
| <b>Funding:</b>                     | No                                                                                                                                                                                                       |
| <b>Conflict of interest:</b>        | No                                                                                                                                                                                                       |
| <b>External collaboration:</b>      | No                                                                                                                                                                                                       |
| <b>Journal:</b>                     | International Journal of Cardiology                                                                                                                                                                      |
| <b>Topic:</b>                       | Cardiology and Cardiovascular Medicine                                                                                                                                                                   |
| <b>Ranking:</b>                     | 81                                                                                                                                                                                                       |



**Donahue 2015<sup>60</sup>**

|                                     |                                                                                                                   |
|-------------------------------------|-------------------------------------------------------------------------------------------------------------------|
| <b>ID:</b>                          | 32                                                                                                                |
| <b>Year of publication:</b>         | 2015                                                                                                              |
| <b>Italian Region/s involved:</b>   | Campania, Lombardia                                                                                               |
| <b>The title of the manuscript:</b> | Acute kidney injury in patients with chronic kidney disease undergoing internal carotid artery stent implantation |
| <b>Study design:</b>                | Cohort study                                                                                                      |
| <b>Mono-/Multi-center:</b>          | Mono-center                                                                                                       |
| <b>The level of evidence:</b>       | III - 2                                                                                                           |
| <b>Funding:</b>                     | No                                                                                                                |
| <b>Conflict of interest:</b>        | No                                                                                                                |
| <b>External collaboration:</b>      | No                                                                                                                |
| <b>Journal:</b>                     | JACC: Cardiovascular Interventions                                                                                |
| <b>Topic:</b>                       | Cardiology and Cardiovascular Medicine                                                                            |
| <b>Ranking:</b>                     | 5                                                                                                                 |

**Bianchi 2013<sup>52</sup>**

|                                     |                                                                                                       |
|-------------------------------------|-------------------------------------------------------------------------------------------------------|
| <b>ID:</b>                          | 33                                                                                                    |
| <b>Year of publication:</b>         | 2013                                                                                                  |
| <b>Italian Region/s involved:</b>   | Lombardia                                                                                             |
| <b>The title of the manuscript:</b> | Cardiac catheterization and postoperative acute kidney failure in congenital heart pediatric patients |
| <b>Study design:</b>                | Cohort study                                                                                          |
| <b>Mono-/Multi-center:</b>          | Mono-center                                                                                           |
| <b>The level of evidence:</b>       | III - 2                                                                                               |
| <b>Funding:</b>                     | Yes                                                                                                   |
| <b>Conflict of interest:</b>        | No                                                                                                    |
| <b>External collaboration:</b>      | No                                                                                                    |
| <b>Journal:</b>                     | Anesthesia and Analgesia                                                                              |
| <b>Topic:</b>                       | Anesthesiology and Pain Medicine                                                                      |
| <b>Ranking:</b>                     | 11                                                                                                    |

|                                     |                                                                                                                                                                                          |
|-------------------------------------|------------------------------------------------------------------------------------------------------------------------------------------------------------------------------------------|
| <b>ID:</b>                          | 34                                                                                                                                                                                       |
| <b>Year of publication:</b>         | 2014                                                                                                                                                                                     |
| <b>Italian Region/s involved:</b>   | Sicilia                                                                                                                                                                                  |
| <b>The title of the manuscript:</b> | Renal function-adjusted contrast volume redefines the baseline estimation of contrast-induced acute kidney injury risk in patients undergoing primary percutaneous coronary intervention |
| <b>Study design:</b>                | Cohort study                                                                                                                                                                             |
| <b>Mono-/Multi-center:</b>          | Mono-center                                                                                                                                                                              |
| <b>The level of evidence:</b>       | III - 2                                                                                                                                                                                  |
| <b>Funding:</b>                     | Yes                                                                                                                                                                                      |
| <b>Conflict of interest:</b>        | No                                                                                                                                                                                       |
| <b>External collaboration:</b>      | No                                                                                                                                                                                       |
| <b>Journal:</b>                     | Circulation: Cardiovascular Interventions                                                                                                                                                |
| <b>Topic:</b>                       | Cardiology and Cardiovascular Medicine                                                                                                                                                   |
| <b>Ranking:</b>                     | 8                                                                                                                                                                                        |

**Bolognese 2012<sup>78</sup>**

|                                     |                                                                                                                                                                                                                                              |
|-------------------------------------|----------------------------------------------------------------------------------------------------------------------------------------------------------------------------------------------------------------------------------------------|
| <b>ID:</b>                          | 35                                                                                                                                                                                                                                           |
| <b>Year of publication:</b>         | 2012                                                                                                                                                                                                                                         |
| <b>Italian Region/s involved:</b>   | Toscana                                                                                                                                                                                                                                      |
| <b>The title of the manuscript:</b> | Impact of iso-osmolar versus low-osmolar contrast agents on contrast-induced nephropathy and tissue reperfusion in unselected patients with ST-segment elevation myocardial infarction undergoing primary percutaneous coronary intervention |
| <b>Study design:</b>                | Randomized clinical trial                                                                                                                                                                                                                    |
| <b>Mono-/Multi-center:</b>          | Mono-center                                                                                                                                                                                                                                  |
| <b>The level of evidence:</b>       | II                                                                                                                                                                                                                                           |
| <b>Funding:</b>                     | No                                                                                                                                                                                                                                           |
| <b>Conflict of interest:</b>        | Yes                                                                                                                                                                                                                                          |
| <b>External collaboration:</b>      | Yes                                                                                                                                                                                                                                          |
| <b>Journal:</b>                     | Journal of the American College of Cardiology                                                                                                                                                                                                |
| <b>Topic:</b>                       | Cardiology and Cardiovascular Medicine                                                                                                                                                                                                       |
| <b>Ranking:</b>                     | 1                                                                                                                                                                                                                                            |

**Andò 2015<sup>51</sup>**

|                                     |                                                                                |
|-------------------------------------|--------------------------------------------------------------------------------|
| <b>ID:</b>                          | 36                                                                             |
| <b>Year of publication:</b>         | 2015                                                                           |
| <b>Italian Region/s involved:</b>   | Sicilia, Piemonte, Lombardia, Emilia Romagna, Lombardia, Liguria               |
| <b>The title of the manuscript:</b> | Acute kidney injury after percutaneous coronary intervention                   |
| <b>Study design:</b>                | Randomized clinical trial                                                      |
| <b>Mono-/Multi-center:</b>          | Multi-center                                                                   |
| <b>The level of evidence:</b>       | II                                                                             |
| <b>Funding:</b>                     | Yes                                                                            |
| <b>Conflict of interest:</b>        | Yes                                                                            |
| <b>External collaboration:</b>      | Yes                                                                            |
| <b>Journal:</b>                     | Catheterization and cardiovascular interventions                               |
| <b>Topic:</b>                       | Cardiology and Cardiovascular Medicine Radiology, Nuclear Medicine and Imaging |
| <b>Ranking:</b>                     | 63                                                                             |

**Barbieri 2015<sup>57</sup>**

|                                     |                                                                                    |
|-------------------------------------|------------------------------------------------------------------------------------|
| <b>ID:</b>                          | 37                                                                                 |
| <b>Year of publication:</b>         | 2015                                                                               |
| <b>Italian Region/s involved:</b>   | Piemonte, Campania                                                                 |
| <b>The title of the manuscript:</b> | Elevated homocysteine and the risk of contrast-induced nephropathy: a cohort study |
| <b>Study design:</b>                | Cohort study                                                                       |
| <b>Mono-/Multi-center:</b>          | Mono-center                                                                        |
| <b>The level of evidence:</b>       | III - 2                                                                            |
| <b>Funding:</b>                     | No                                                                                 |
| <b>Conflict of interest:</b>        | No                                                                                 |
| <b>External collaboration:</b>      | Yes                                                                                |
| <b>Journal:</b>                     | Angiology                                                                          |
| <b>Topic:</b>                       | Cardiology and Cardiovascular Medicine                                             |
| <b>Ranking:</b>                     | 143                                                                                |

**Budano 2011<sup>69</sup>**

|                                     |                                                                                |
|-------------------------------------|--------------------------------------------------------------------------------|
| <b>ID:</b>                          | 38                                                                             |
| <b>Year of publication:</b>         | 2011                                                                           |
| <b>Italian Region/s involved:</b>   | Piemonte, Lombardia                                                            |
| <b>The title of the manuscript:</b> | Impact of contrast-induced acute kidney injury definition on clinical outcomes |
| <b>Study design:</b>                | Cohort study                                                                   |
| <b>Mono-/Multi-center:</b>          | Mono-center                                                                    |
| <b>The level of evidence:</b>       | III - 2                                                                        |
| <b>Funding:</b>                     | No                                                                             |
| <b>Conflict of interest:</b>        | No                                                                             |
| <b>External collaboration:</b>      | No                                                                             |
| <b>Journal:</b>                     | American Heart Journal                                                         |
| <b>Topic:</b>                       | Cardiology and Cardiovascular Medicine                                         |
| <b>Ranking:</b>                     | 19                                                                             |

|                                     |                                                                                                                                                                                                                                                              |
|-------------------------------------|--------------------------------------------------------------------------------------------------------------------------------------------------------------------------------------------------------------------------------------------------------------|
| <b>ID:</b>                          | 39                                                                                                                                                                                                                                                           |
| <b>Year of publication:</b>         | 2015                                                                                                                                                                                                                                                         |
| <b>Italian Region/s involved:</b>   | Lombardia, Emilia Romagna                                                                                                                                                                                                                                    |
| <b>The title of the manuscript:</b> | Incidence, prognostic impact, and optimal definition of contrast-induced acute kidney injury in consecutive patients with stable or unstable coronary artery disease undergoing percutaneous coronary intervention insights from the all-comer PRODIGY trial |
| <b>Study design:</b>                | Randomized clinical trial                                                                                                                                                                                                                                    |
| <b>Mono-/Multi-center:</b>          | Multi-center                                                                                                                                                                                                                                                 |
| <b>The level of evidence:</b>       | II                                                                                                                                                                                                                                                           |
| <b>Funding:</b>                     | No                                                                                                                                                                                                                                                           |
| <b>Conflict of interest:</b>        | No                                                                                                                                                                                                                                                           |
| <b>External collaboration:</b>      | Yes                                                                                                                                                                                                                                                          |
| <b>Journal:</b>                     | Catheterization and cardiovascular interventions                                                                                                                                                                                                             |
| <b>Topic:</b>                       | Cardiology and Cardiovascular Medicine Radiology, Nuclear Medicine and Imaging                                                                                                                                                                               |
| <b>Ranking:</b>                     | 63                                                                                                                                                                                                                                                           |



**Alessandri 2013<sup>33</sup>**

|                                     |                                                                                           |
|-------------------------------------|-------------------------------------------------------------------------------------------|
| <b>ID:</b>                          | 40                                                                                        |
| <b>Year of publication:</b>         | 2013                                                                                      |
| <b>Italian Region/s involved:</b>   | Lazio                                                                                     |
| <b>The title of the manuscript:</b> | Prevention of acute renal failure post-contrast imaging in cardiology: a randomized study |
| <b>Study design:</b>                | Cohort study                                                                              |
| <b>Mono-/Multi-center:</b>          | Mono-center                                                                               |
| <b>The level of evidence:</b>       | III - 2                                                                                   |
| <b>Funding:</b>                     | No                                                                                        |
| <b>Conflict of interest:</b>        | No                                                                                        |
| <b>External collaboration:</b>      | No                                                                                        |
| <b>Journal:</b>                     | European Review for Medical and Pharmacological Sciences                                  |
| <b>Topic:</b>                       | Medicine (miscellaneous)                                                                  |
| <b>Ranking:</b>                     | 121                                                                                       |

**Briguori 2004<sup>35</sup>**

|                                     |                                                                                                 |
|-------------------------------------|-------------------------------------------------------------------------------------------------|
| <b>ID:</b>                          | 41                                                                                              |
| <b>Year of publication:</b>         | 2004                                                                                            |
| <b>Italian Region/s involved:</b>   | Campania, Lombardia                                                                             |
| <b>The title of the manuscript:</b> | Standard vs double dose of N-acetylcysteine to prevent contrast agent-associated nephrotoxicity |
| <b>Study design:</b>                | Randomized clinical trial                                                                       |
| <b>Mono-/Multi-center:</b>          | Mono-center                                                                                     |
| <b>The level of evidence:</b>       | II                                                                                              |
| <b>Funding:</b>                     | No                                                                                              |
| <b>Conflict of interest:</b>        | No                                                                                              |
| <b>External collaboration:</b>      | No                                                                                              |
| <b>Journal:</b>                     | European Heart Journal                                                                          |
| <b>Topic:</b>                       | Cardiology and Cardiovascular Medicine                                                          |
| <b>Ranking:</b>                     | 3                                                                                               |

**Briguori 2005<sup>38</sup>**

|                                     |                                                                                                    |
|-------------------------------------|----------------------------------------------------------------------------------------------------|
| <b>ID:</b>                          | 42                                                                                                 |
| <b>Year of publication:</b>         | 2005                                                                                               |
| <b>Italian Region/s involved:</b>   | Campania, Lombardia                                                                                |
| <b>The title of the manuscript:</b> | Nephrotoxicity of low-osmolality versus iso-osmolality contrast agents: impact of N-acetylcysteine |
| <b>Study design:</b>                | Cohort study                                                                                       |
| <b>Mono-/Multi-center:</b>          | Mono-center                                                                                        |
| <b>The level of evidence:</b>       | III - 2                                                                                            |
| <b>Funding:</b>                     | No                                                                                                 |
| <b>Conflict of interest:</b>        | No                                                                                                 |
| <b>External collaboration:</b>      | No                                                                                                 |
| <b>Journal:</b>                     | Kidney International                                                                               |
| <b>Topic:</b>                       | Nephrology                                                                                         |
| <b>Ranking:</b>                     | 17                                                                                                 |

**Briguori 2007<sup>37</sup>**

|                                     |                                                                                 |
|-------------------------------------|---------------------------------------------------------------------------------|
| <b>ID:</b>                          | 43                                                                              |
| <b>Year of publication:</b>         | 2007                                                                            |
| <b>Italian Region/s involved:</b>   | Campania, Lombardia                                                             |
| <b>The title of the manuscript:</b> | Renal insufficiency following contrast media administration trial<br>(REMEDIAL) |
| <b>Study design:</b>                | Randomized clinical trial                                                       |
| <b>Mono-/Multi-center:</b>          | Multi-center                                                                    |
| <b>The level of evidence:</b>       | II                                                                              |
| <b>Funding:</b>                     | No                                                                              |
| <b>Conflict of interest:</b>        | No                                                                              |
| <b>External collaboration:</b>      | No                                                                              |
| <b>Journal:</b>                     | Circulation                                                                     |
| <b>Topic:</b>                       | Cardiology and Cardiovascular Medicine                                          |
| <b>Ranking:</b>                     | 2                                                                               |

**Briguori 2002<sup>31</sup>**

|                                     |                                                             |
|-------------------------------------|-------------------------------------------------------------|
| <b>ID:</b>                          | 44                                                          |
| <b>Year of publication:</b>         | 2002                                                        |
| <b>Italian Region/s involved:</b>   | Campania, Lombardia                                         |
| <b>The title of the manuscript:</b> | Acetylcysteine and contrast agent-associated nephrotoxicity |
| <b>Study design:</b>                | Randomized clinical trial                                   |
| <b>Mono-/Multi-center:</b>          | Multi-center                                                |
| <b>The level of evidence:</b>       | II                                                          |
| <b>Funding:</b>                     | No                                                          |
| <b>Conflict of interest:</b>        | No                                                          |
| <b>External collaboration:</b>      | No                                                          |
| <b>Journal:</b>                     | Journal of the American College of Cardiology               |
| <b>Topic:</b>                       | Cardiology and Cardiovascular Medicine                      |
| <b>Ranking:</b>                     | 1                                                           |

**Briguori 2015<sup>43</sup>**

|                                     |                                                                                  |
|-------------------------------------|----------------------------------------------------------------------------------|
| <b>ID:</b>                          | 45                                                                               |
| <b>Year of publication:</b>         | 2015                                                                             |
| <b>Italian Region/s involved:</b>   | Campania                                                                         |
| <b>The title of the manuscript:</b> | RenalGuard system in high-risk patients for contrast-induced acute kidney injury |
| <b>Study design:</b>                | Cohort study                                                                     |
| <b>Mono-/Multi-center:</b>          | Mono-center                                                                      |
| <b>The level of evidence:</b>       | III - 2                                                                          |
| <b>Funding:</b>                     | Yes                                                                              |
| <b>Conflict of interest:</b>        | No                                                                               |
| <b>External collaboration:</b>      | No                                                                               |
| <b>Journal:</b>                     | American Heart Journal                                                           |
| <b>Topic:</b>                       | Cardiology and Cardiovascular Medicine                                           |
| <b>Ranking:</b>                     | 19                                                                               |

**Calabrò 2011<sup>30</sup>**

|                                     |                                                                                                                                                                   |
|-------------------------------------|-------------------------------------------------------------------------------------------------------------------------------------------------------------------|
| <b>ID:</b>                          | 46                                                                                                                                                                |
| <b>Year of publication:</b>         | 2011                                                                                                                                                              |
| <b>Italian Region/s involved:</b>   | Campania                                                                                                                                                          |
| <b>The title of the manuscript:</b> | Use and efficacy of saline hydration and N-acetyl cysteine to prevent contrast-induced nephropathy in low-risk populations undergoing coronary artery angiography |
| <b>Study design:</b>                | Cohort study                                                                                                                                                      |
| <b>Mono-/Multi-center:</b>          | Mono-center                                                                                                                                                       |
| <b>The level of evidence:</b>       | III - 2                                                                                                                                                           |
| <b>Funding:</b>                     | No                                                                                                                                                                |
| <b>Conflict of interest:</b>        | No                                                                                                                                                                |
| <b>External collaboration:</b>      | No                                                                                                                                                                |
| <b>Journal:</b>                     | Internal and emergency medicine                                                                                                                                   |
| <b>Topic:</b>                       | Emergency Medicine                                                                                                                                                |
| <b>Ranking:</b>                     | 11                                                                                                                                                                |

**Carraro 1998<sup>79</sup>**

|                                     |                                                                                                                                                                                 |
|-------------------------------------|---------------------------------------------------------------------------------------------------------------------------------------------------------------------------------|
| <b>ID:</b>                          | 47                                                                                                                                                                              |
| <b>Year of publication:</b>         | 1998                                                                                                                                                                            |
| <b>Italian Region/s involved:</b>   | Friuli-Venezia Giulia                                                                                                                                                           |
| <b>The title of the manuscript:</b> | Effects of a dimeric vs a monomeric nonionic contrast medium on renal function in patients with mild to moderate renal insufficiency: a double-blind, randomized clinical trial |
| <b>Study design:</b>                | Randomized clinical trial                                                                                                                                                       |
| <b>Mono-/Multi-center:</b>          | Mono-center                                                                                                                                                                     |
| <b>The level of evidence:</b>       | II                                                                                                                                                                              |
| <b>Funding:</b>                     | No                                                                                                                                                                              |
| <b>Conflict of interest:</b>        | No                                                                                                                                                                              |
| <b>External collaboration:</b>      | Yes                                                                                                                                                                             |
| <b>Journal:</b>                     | European Radiology                                                                                                                                                              |
| <b>Topic:</b>                       | Radiology, Nuclear Medicine, and Imaging                                                                                                                                        |
| <b>Ranking:</b>                     | 17                                                                                                                                                                              |



**Briguori 2004<sup>36</sup>**

|                                     |                                                                                                 |
|-------------------------------------|-------------------------------------------------------------------------------------------------|
| <b>ID:</b>                          | 48                                                                                              |
| <b>Year of publication:</b>         | 2004                                                                                            |
| <b>Italian Region/s involved:</b>   | Campania, Lombardia                                                                             |
| <b>The title of the manuscript:</b> | N-Acetylcysteine versus fenoldopam mesylate to prevent contrast agent-associated nephrotoxicity |
| <b>Study design:</b>                | Randomized clinical trial                                                                       |
| <b>Mono-/Multi-center:</b>          | Mono-center                                                                                     |
| <b>The level of evidence:</b>       | II                                                                                              |
| <b>Funding:</b>                     | No                                                                                              |
| <b>Conflict of interest:</b>        | No                                                                                              |
| <b>External collaboration:</b>      | No                                                                                              |
| <b>Journal:</b>                     | Journal of the American College of Cardiology                                                   |
| <b>Topic:</b>                       | Cardiology and Cardiovascular Medicine                                                          |
| <b>Ranking:</b>                     | 1                                                                                               |

**Patti 2011<sup>21</sup>**

|                                     |                                                                                                                                                                                                                                                                                                               |
|-------------------------------------|---------------------------------------------------------------------------------------------------------------------------------------------------------------------------------------------------------------------------------------------------------------------------------------------------------------|
| <b>ID:</b>                          | 49                                                                                                                                                                                                                                                                                                            |
| <b>Year of publication:</b>         | 2011                                                                                                                                                                                                                                                                                                          |
| <b>Italian Region/s involved:</b>   | Lazio, Puglia                                                                                                                                                                                                                                                                                                 |
| <b>The title of the manuscript:</b> | Short-term, high-dose Atorvastatin pretreatment to prevent contrast-induced nephropathy in patients with acute coronary syndromes undergoing percutaneous coronary intervention (from the ARMYDA-CIN [atorvastatin for reduction of myocardial damage during angioplasty--contrast-induced nephropathy] trial |
| <b>Study design:</b>                | Randomized clinical trial                                                                                                                                                                                                                                                                                     |
| <b>Mono-/Multi-center:</b>          | Multi-center                                                                                                                                                                                                                                                                                                  |
| <b>The level of evidence:</b>       | II                                                                                                                                                                                                                                                                                                            |
| <b>Funding:</b>                     | No                                                                                                                                                                                                                                                                                                            |
| <b>Conflict of interest:</b>        | No                                                                                                                                                                                                                                                                                                            |
| <b>External collaboration:</b>      | No                                                                                                                                                                                                                                                                                                            |
| <b>Journal:</b>                     | Journal of the American College of Cardiology                                                                                                                                                                                                                                                                 |
| <b>Topic:</b>                       | Cardiology and Cardiovascular Medicine                                                                                                                                                                                                                                                                        |
| <b>Ranking:</b>                     | 1                                                                                                                                                                                                                                                                                                             |

**Marenzi 2006<sup>34</sup>**

|                                     |                                                                          |
|-------------------------------------|--------------------------------------------------------------------------|
| <b>ID:</b>                          | 50                                                                       |
| <b>Year of publication:</b>         | 2006                                                                     |
| <b>Italian Region/s involved:</b>   | Lombardia                                                                |
| <b>The title of the manuscript:</b> | N-acetylcysteine and contrast-induced nephropathy in primary angioplasty |
| <b>Study design:</b>                | Randomized clinical trial                                                |
| <b>Mono-/Multi-center:</b>          | Mono-center                                                              |
| <b>The level of evidence:</b>       | II                                                                       |
| <b>Funding:</b>                     | Yes                                                                      |
| <b>Conflict of interest:</b>        | No                                                                       |
| <b>External collaboration:</b>      | No                                                                       |
| <b>Journal:</b>                     | The New England Journal of Medicine                                      |
| <b>Topic:</b>                       | Medicine (miscellaneous)                                                 |
| <b>Ranking:</b>                     | 4                                                                        |

**Marenzi 2006<sup>48</sup>**

|                                     |                                                                                                                 |
|-------------------------------------|-----------------------------------------------------------------------------------------------------------------|
| <b>ID:</b>                          | 51                                                                                                              |
| <b>Year of publication:</b>         | 2006                                                                                                            |
| <b>Italian Region/s involved:</b>   | Lombardia                                                                                                       |
| <b>The title of the manuscript:</b> | Comparison of two hemofiltration protocols for prevention of contrast-induced nephropathy in high-risk patients |
| <b>Study design:</b>                | Randomized clinical trial                                                                                       |
| <b>Mono-/Multi-center:</b>          | Mono-center                                                                                                     |
| <b>The level of evidence:</b>       | II                                                                                                              |
| <b>Funding:</b>                     | No                                                                                                              |
| <b>Conflict of interest:</b>        | No                                                                                                              |
| <b>External collaboration:</b>      | No                                                                                                              |
| <b>Journal:</b>                     | American Journal of Medicine                                                                                    |
| <b>Topic:</b>                       | Medicine (miscellaneous)                                                                                        |
| <b>Ranking:</b>                     | 115                                                                                                             |

**Biondi-Zoccai 2014<sup>80</sup>**

|                                     |                                                                                                                       |
|-------------------------------------|-----------------------------------------------------------------------------------------------------------------------|
| <b>ID:</b>                          | 52                                                                                                                    |
| <b>Year of publication:</b>         | 2014                                                                                                                  |
| <b>Italian Region/s involved:</b>   | Lazio, Piemonte, Campania                                                                                             |
| <b>The title of the manuscript:</b> | Nephropathy after administration of iso-osmolar and low-osmolar contrast media: evidence from a network meta-analysis |
| <b>Study design:</b>                | Meta-analysis                                                                                                         |
| <b>Mono-/Multi-center:</b>          | -                                                                                                                     |
| <b>The level of evidence:</b>       | I                                                                                                                     |
| <b>Funding:</b>                     | No                                                                                                                    |
| <b>Conflict of interest:</b>        | No                                                                                                                    |
| <b>External collaboration:</b>      | Yes                                                                                                                   |
| <b>Journal:</b>                     | International Journal of Cardiology                                                                                   |
| <b>Topic:</b>                       | Cardiology and Cardiovascular Medicine                                                                                |
| <b>Ranking:</b>                     | 81                                                                                                                    |

**Barbieri 2014<sup>28</sup>**

|                                     |                                                                                                               |
|-------------------------------------|---------------------------------------------------------------------------------------------------------------|
| <b>ID:</b>                          | 53                                                                                                            |
| <b>Year of publication:</b>         | 2014                                                                                                          |
| <b>Italian Region/s involved:</b>   | Piemonte                                                                                                      |
| <b>The title of the manuscript:</b> | The role of statins in the prevention of contrast-induced nephropathy: a meta-analysis of 8 randomized trials |
| <b>Study design:</b>                | Meta-analysis                                                                                                 |
| <b>Mono-/Multi-center:</b>          | -                                                                                                             |
| <b>The level of evidence:</b>       | I                                                                                                             |
| <b>Funding:</b>                     | No                                                                                                            |
| <b>Conflict of interest:</b>        | No                                                                                                            |
| <b>External collaboration:</b>      | No                                                                                                            |
| <b>Journal:</b>                     | Journal of Thrombosis and Thrombolysis                                                                        |
| <b>Topic:</b>                       | Cardiology and Cardiovascular Medicine Hematology                                                             |
| <b>Ranking:</b>                     | 112                                                                                                           |

**Giacoppo 2014<sup>27</sup>**

|                                     |                                                                                                                                                                                        |
|-------------------------------------|----------------------------------------------------------------------------------------------------------------------------------------------------------------------------------------|
| <b>ID:</b>                          | 54                                                                                                                                                                                     |
| <b>Year of publication:</b>         | 2014                                                                                                                                                                                   |
| <b>Italian Region/s involved:</b>   | Calabria                                                                                                                                                                               |
| <b>The title of the manuscript:</b> | Meta-analysis of randomized controlled trials of preprocedural statin administration for reducing contrast-induced acute kidney injury in patients undergoing coronary catheterization |
| <b>Study design:</b>                | Meta-analysis                                                                                                                                                                          |
| <b>Mono-/Multi-center:</b>          | -                                                                                                                                                                                      |
| <b>The level of evidence:</b>       | I                                                                                                                                                                                      |
| <b>Funding:</b>                     | No                                                                                                                                                                                     |
| <b>Conflict of interest:</b>        | No                                                                                                                                                                                     |
| <b>External collaboration:</b>      | No                                                                                                                                                                                     |
| <b>Journal:</b>                     | Journal of the American College of Cardiology                                                                                                                                          |
| <b>Topic:</b>                       | Cardiology and Cardiovascular Medicine                                                                                                                                                 |
| <b>Ranking:</b>                     | 1                                                                                                                                                                                      |

**Lombardi 2015<sup>83</sup>**

|                                     |                                                                                                                                                                                                            |
|-------------------------------------|------------------------------------------------------------------------------------------------------------------------------------------------------------------------------------------------------------|
| <b>ID:</b>                          | 55                                                                                                                                                                                                         |
| <b>Year of publication:</b>         | 2015                                                                                                                                                                                                       |
| <b>Italian Region/s involved:</b>   | Toscana                                                                                                                                                                                                    |
| <b>The title of the manuscript:</b> | 2015 update on acute adverse reactions to gadolinium-based contrast agents in cardiovascular mr. large multi-national and multi-ethnic population experience with 37788 patients from the eurocmr registry |
| <b>Study design:</b>                | Cohort study                                                                                                                                                                                               |
| <b>Mono-/Multi-center:</b>          | Multi-center                                                                                                                                                                                               |
| <b>The level of evidence:</b>       | III - 2                                                                                                                                                                                                    |
| <b>Funding:</b>                     | Yes                                                                                                                                                                                                        |
| <b>Conflict of interest:</b>        | Yes                                                                                                                                                                                                        |
| <b>External collaboration:</b>      | Yes                                                                                                                                                                                                        |
| <b>Journal:</b>                     | Journal of Cardiovascular Magnetic Resonance                                                                                                                                                               |
| <b>Topic:</b>                       | Radiological and Ultrasound Technology                                                                                                                                                                     |
| <b>Ranking:</b>                     | 1                                                                                                                                                                                                          |



**Vallero 2002<sup>32</sup>**

|                                     |                                                                                                           |
|-------------------------------------|-----------------------------------------------------------------------------------------------------------|
| <b>ID:</b>                          | 56                                                                                                        |
| <b>Year of publication:</b>         | 2002                                                                                                      |
| <b>Italian Region/s involved:</b>   | Piemonte                                                                                                  |
| <b>The title of the manuscript:</b> | Contrast nephropathy in cardiac procedures: no advantages with prophylactic use of N-acetylcysteine (NAC) |
| <b>Study design:</b>                | Cohort study                                                                                              |
| <b>Mono-/Multi-center:</b>          | Mono-center                                                                                               |
| <b>The level of evidence:</b>       | III - 2                                                                                                   |
| <b>Funding:</b>                     | No                                                                                                        |
| <b>Conflict of interest:</b>        | No                                                                                                        |
| <b>External collaboration:</b>      | No                                                                                                        |
| <b>Journal:</b>                     | Giornale Italiano di Nefrologia                                                                           |
| <b>Topic:</b>                       | Nephrology                                                                                                |
| <b>Ranking:</b>                     | 51                                                                                                        |

|                                     |                                                                                                                                       |
|-------------------------------------|---------------------------------------------------------------------------------------------------------------------------------------|
| <b>ID:</b>                          | 57                                                                                                                                    |
| <b>Year of publication:</b>         | 1990                                                                                                                                  |
| <b>Italian Region/s involved:</b>   | Campania                                                                                                                              |
| <b>The title of the manuscript:</b> | Randomized prospective study on renal effects of two different contrast media in humans: protective role of a calcium channel blocker |
| <b>Study design:</b>                | Randomized clinical trial                                                                                                             |
| <b>Mono-/Multi-center:</b>          | Mono-center                                                                                                                           |
| <b>The level of evidence:</b>       | II                                                                                                                                    |
| <b>Funding:</b>                     | No                                                                                                                                    |
| <b>Conflict of interest:</b>        | No                                                                                                                                    |
| <b>External collaboration:</b>      | No                                                                                                                                    |
| <b>Journal:</b>                     | Nephron                                                                                                                               |
| <b>Topic:</b>                       | Nephrology                                                                                                                            |
| <b>Ranking:</b>                     | 26                                                                                                                                    |

|                                     |                                                                                                                                                       |
|-------------------------------------|-------------------------------------------------------------------------------------------------------------------------------------------------------|
| <b>ID:</b>                          | 58                                                                                                                                                    |
| <b>Year of publication:</b>         | 2001                                                                                                                                                  |
| <b>Italian Region/s involved:</b>   | Lombardia                                                                                                                                             |
| <b>The title of the manuscript:</b> | Pharmacokinetics and safety of iomeprol in healthy volunteers and in patients with renal impairment or end-stage renal disease requiring hemodialysis |
| <b>Study design:</b>                | Randomized clinical trial                                                                                                                             |
| <b>Mono-/Multi-center:</b>          | Mono-center                                                                                                                                           |
| <b>The level of evidence:</b>       | II                                                                                                                                                    |
| <b>Funding:</b>                     | No                                                                                                                                                    |
| <b>Conflict of interest:</b>        | No                                                                                                                                                    |
| <b>External collaboration:</b>      | No                                                                                                                                                    |
| <b>Journal:</b>                     | Investigative Radiology                                                                                                                               |
| <b>Topic:</b>                       | Radiology, Nuclear Medicine, and Imaging                                                                                                              |
| <b>Ranking:</b>                     | 7                                                                                                                                                     |

**Simonetti 1994<sup>81</sup>**

|                                     |                                                                                                                                 |
|-------------------------------------|---------------------------------------------------------------------------------------------------------------------------------|
| <b>ID:</b>                          | 59                                                                                                                              |
| <b>Year of publication:</b>         | 1994                                                                                                                            |
| <b>Italian Region/s involved:</b>   | Lazio, Sardegna                                                                                                                 |
| <b>The title of the manuscript:</b> | A double-blind comparative study of the safety and efficacy of iomeprol in renal intra-arterial digital subtraction angiography |
| <b>Study design:</b>                | Randomized clinical trial                                                                                                       |
| <b>Mono-/Multi-center:</b>          | Mono-center                                                                                                                     |
| <b>The level of evidence:</b>       | II                                                                                                                              |
| <b>Funding:</b>                     | No                                                                                                                              |
| <b>Conflict of interest:</b>        | No                                                                                                                              |
| <b>External collaboration:</b>      | No                                                                                                                              |
| <b>Journal:</b>                     | European Journal of Radiology                                                                                                   |
| <b>Topic:</b>                       | Radiology, Nuclear Medicine, and Imaging                                                                                        |
| <b>Ranking:</b>                     | 44                                                                                                                              |

**Morabito 2012<sup>58</sup>**

|                                     |                                                                                                                     |
|-------------------------------------|---------------------------------------------------------------------------------------------------------------------|
| <b>ID:</b>                          | 60                                                                                                                  |
| <b>Year of publication:</b>         | 2012                                                                                                                |
| <b>Italian Region/s involved:</b>   | Lazio                                                                                                               |
| <b>The title of the manuscript:</b> | Incidence of contrast-induced acute kidney injury associated with diagnostic or interventional coronary angiography |
| <b>Study design:</b>                | Cohort study                                                                                                        |
| <b>Mono-/Multi-center:</b>          | Mono-center                                                                                                         |
| <b>The level of evidence:</b>       | III-2                                                                                                               |
| <b>Funding:</b>                     | No                                                                                                                  |
| <b>Conflict of interest:</b>        | No                                                                                                                  |
| <b>External collaboration:</b>      | No                                                                                                                  |
| <b>Journal:</b>                     | Journal of Nephrology                                                                                               |
| <b>Topic:</b>                       | Nephrology                                                                                                          |
| <b>Ranking:</b>                     | 23                                                                                                                  |

## S2 Appendix. List of reviews included in the systematic review.

| References                                                                                                                                                                                                                                                                                                                      |
|---------------------------------------------------------------------------------------------------------------------------------------------------------------------------------------------------------------------------------------------------------------------------------------------------------------------------------|
| 1. Caiazza A, Russo L, Sabbatini M, Russo D. Hemodynamic and tubular changes induced by contrast media. <i>Biomed Res Int United States</i> ; 2014;2014:578974.                                                                                                                                                                 |
| 2. Liccardi G, Lobefalo G, Florio E Di, Iorio C Di, Occhiochiuso L, Romano L, Savoia G, Massa RM, D'Amato G. Strategies for the prevention of asthmatic, anaphylactic and anaphylactoid reactions during the administration of anesthetics and/or contrast media. <i>J Investig Allergol Clin Immunol Spain</i> ; 2008;18:1–11. |
| 3. Stacul F, Molen AJ van der, Reimer P, Webb JAW, Thomsen HS, Morcos SK, Almen T, Aspelin P, Bellin M-F, Clement O, Heinz-Peer G. Contrast induced nephropathy: updated ESUR Contrast Media Safety Committee guidelines. <i>Eur Radiol Germany</i> ; 2011;21:2527–2541.                                                        |
| 4. Aurelio A, Durante A. Contrast-induced nephropathy in percutaneous coronary interventions: pathogenesis, risk factors, outcome, prevention and treatment. <i>Cardiology Switzerland</i> ; 2014;128:62–72.                                                                                                                    |
| 5. Briguori C, Donnarumma E, Quintavalle C, Fiore D, Condorelli G. Contrast-induced acute kidney injury: potential new strategies. <i>Curr Opin Nephrol Hypertens England</i> ; 2015;24:145–153.                                                                                                                                |
| 6. Liccardi G, Salzillo A, Blasio F De, D'Amato G. Control of asthma for reducing the risk of bronchospasm in asthmatics undergoing general anesthesia and/or intravascular administration of radiographic contrast media. <i>Curr Med Res Opin England</i> ; 2009;25:1621–1630.                                                |
| 7. Detrenis S, Meschi M, Mar Jordana Sanchez M del, Savazzi G. Contrast medium induced nephropathy in urological practice. <i>J Urol United States</i> ; 2007;178:1164–1170.                                                                                                                                                    |
| 8. Briguori C. Renalguard system in high-risk patients for contrast-induced acute kidney injury. <i>Minerva Cardioangiol Italy</i> ; 2012;60:291–297.                                                                                                                                                                           |
| 9. Briguori C, Airolidi F, Morici N, Colombo A. New pharmacological protocols to prevent or reduce contrast media nephropathy. <i>Minerva Cardioangiol Italy</i> ; 2005;53:49–58.                                                                                                                                               |
| 10. Stacul F, Adam A, Becker CR, Davidson C, Lameire N, McCullough PA, Tumlin J. Strategies to reduce the risk of contrast-induced nephropathy. <i>Am J Cardiol United States</i> ; 2006;98:59K–77K.                                                                                                                            |
| 11. Quintavalle C, Donnarumma E, Fiore D, Briguori C, Condorelli G. Therapeutic strategies to prevent contrast-induced acute kidney injury. <i>Curr Opin Cardiol United States</i> ; 2013;28:676–682.                                                                                                                           |
| 12. Mautone A, Brown JR. Contrast-induced nephropathy in patients undergoing elective and urgent procedures. <i>J Interv Cardiol United States</i> ; 2010;23:78–85.                                                                                                                                                             |
| 13. Ronco C, Stacul F, McCullough PA. Subclinical acute kidney injury (AKI) due to iodine-based contrast media. <i>Eur Radiol Germany</i> ; 2013;23:319–323.                                                                                                                                                                    |
| 14. Stacul F. Reducing the risks for contrast-induced nephropathy. <i>Cardiovasc. Intervent. Radiol. United States</i> ; 2005;28 Suppl 2:S12-8.                                                                                                                                                                                 |
| 15. Marenzi G, Cabiati A, Milazzo V, Rubino M. Contrast-induced nephropathy. <i>Intern. Emerg. Med. Italy</i> ; 2012;7 Suppl 3:S181-3.                                                                                                                                                                                          |

### S3 Appendix. Full-texts not accessible in the systematic review.

| References                                                                                                                                                                                                        |
|-------------------------------------------------------------------------------------------------------------------------------------------------------------------------------------------------------------------|
| 1. Andreucci M. [Radiographic contrast nephropathy]. <i>G Ital Nefrol Italy</i> ; 2014;31.                                                                                                                        |
| 2. Meschi M, Detrenis S, Savazzi G. [Contrast-induced nephropathy. Current concepts and propositions for Italian guidelines]. <i>Recenti Prog Med Italy</i> ; 2008;99:155–162.                                    |
| 3. Savazzi G, Cusmano F, Allegri L, Garini G. [Physiopathology, clinical aspects and prevention of renal insufficiency caused by contrast media]. <i>Recenti Prog Med Italy</i> ; 1997;88:109–114.                |
| 4. Caterina R De, Limbruno U. [Effects on vasomotor tone and hemostatic function of radiologic contrast media used during invasive cardiological procedures]. <i>G Ital Cardiol Italy</i> ; 1999;29:1047–1052.    |
| 5. Andreucci M. [Statins in CIN: a problem at least partly solved?]. <i>G. Ital. Nefrol. Italy</i> ; 2013.                                                                                                        |
| 6. Guastoni C, Servi S De, Covella P, Turri C, Gidaro B, Bellotti N, Stasi A. [Prevention of contrast-induced acute kidney injury]. <i>G Ital Nefrol Italy</i> ; 2012;29 Suppl 5:S33-45.                          |
| 7. Marenzi G. [Prevention of contrast-induced nephropathy and management of high-risk patients]. <i>G Ital Cardiol (Rome) Italy</i> ; 2009;10:88–96.                                                              |
| 8. Haen C de, Ferla R La. New aspects of osmotic pressure, flow, load, and bolus in adverse reactions and toxicity of contrast media. <i>Invest Radiol United States</i> ; 1991;26 Suppl 1:S26-8-1.               |
| 9. Andreucci M. [Contrast media and nephrotoxicity: a molecular conundrum]. <i>G Ital Nefrol Italy</i> ; 2011;28:355.                                                                                             |
| 10. Baralis G, Steffenino G, Dellavalle A, Scala E La, Uslenghi E. [Selection of contrast media for hemodynamic studies and limitation of the associated risk]. <i>Ital Heart J Suppl Italy</i> ; 2004;5:142–150. |
| 11. Morisetti A, Tirone P, Luzzani F, Haen C de. Toxicological safety assessment of iomeprol, a new X-ray contrast agent. <i>Eur J Radiol Ireland</i> ; 1994;18 Suppl 1:S21-31.                                   |
| 12. Rizzato G. [Strange but true: acetylcysteine protects against kidney damage caused by iodized contrast media]. <i>Radiol Med Italy</i> ; 2001;101:287–289.                                                    |
| 13. Marenzi G, Bartorelli AL. Recent advances in the prevention of radiocontrast-induced nephropathy. <i>Curr Opin Crit Care United States</i> ; 2004;10:505–509.                                                 |
| 14. Stacul F, Thomsen HS. Safety profile of new non-ionic contrast media: renal tolerance. <i>Eur J Radiol Ireland</i> ; 1996;23 Suppl 1:S6-9.                                                                    |
| 15. Stacul F. [Problems with injectable contrast media in the elderly]. <i>Radiol Med Italy</i> ; 2003;106:86–87.                                                                                                 |
| 16. Marenzi G, Briguori C. [The PRATO-ACS study]. <i>G Ital Cardiol (Rome) Italy</i> ; 2013;14:803–808.                                                                                                           |
| 17. Ronco C, Maioli M, Lorusso V, Cruz DN, Stacul F. [Contrast-induced nephropathy: the VIKISAFE study group statement]. <i>G Ital Nefrol Italy</i> ; 2012;29:183–204.                                            |
| 18. Graziani G, Degnoni V, Oldani S, Buskermolen M, Brambilla G. [Pathophysiology and prevention of contrast-induced acute renal failure]. <i>G Ital Nefrol Italy</i> ; 2007;24 Suppl 3:20–24.                    |
| 19. Vercellino M, Bezante GP, Balbi M. Contrast medium induced nephropathy: new insights into prevention and risk management. <i>Cardiovasc Hematol Agents Med Chem Netherlands</i> ; 2009;7:166–180.             |
| 20. Martinelli G, Petrini F, Gamberini E. [Adverse reactions to contrast media: treatment]. <i>Radiol Med Italy</i> ; 2004;107:42–52.                                                                             |
| 21. Genovesi E, Romanello M, Caterina R De. [Contrast-induced acute kidney injury in cardiology]. <i>G Ital Cardiol (Rome) Italy</i> ; 2016;17:984–1000.                                                          |
| 22. Giannattasio M. [Contrast-induced acute renal failure]. <i>G Ital Nefrol Italy</i> ; 2005;22:217–225.                                                                                                         |
